# Supplementary material for: High performance optical sensing nanocomposites for low and ultra-low oxygen concentrations using phase-shift measurements
Source: Royal Society of Chemistry journal article supplement (doi:10.1039/c3an00239j), 2013-01-01
Supplement: c3an00239j.pdf [file c3an00239j.pdf]

## Electronic Supporting Information

### **High performance optical sensing nanocomposites for low and ultra-low oxygen concentrations using phase-shift measurements**

**Santiago Medina-Rodríguez,<sup>\*a,b</sup> Marta Marín-Suárez,<sup>b</sup> Jorge Fernando Fernández-Sánchez,<sup>\*b</sup> Ángel de la Torre-Vega,<sup>a</sup> Etienne Baranoff,<sup>c</sup> Alberto Fernández-Gutiérrez<sup>b</sup>**

*<sup>a</sup>Department of Signal Theory, Networking and Communications, CITIC-UGR, University of Granada, C/ Periodista Rafael Gómez 2, E-18071 Granada, Spain.*

*<sup>b</sup>Department of Analytical Chemistry, Faculty of Sciences, University of Granada, Avda. Fuentenueva s/n, E-18071 Granada, Spain.*

*<sup>c</sup>School of Chemistry, University of Birmingham, Edgbaston, B15 2TT, England.*

*Keywords: optical sensing, trace oxygen, phase-resolved, LED, phase-shift measurement, intelligent packaging*

\* Corresponding authors. Tel.: +34 958 240451; fax: +34 958243328.

*E-mail addresses:* smedina@ugr.es (S. Medina-Rodríguez); jffernan@ugr.es (J.F. Fernández-Sánchez)

## Index

**Details of the homemade system to control oxygen and for lifetime measurements**

**Fundamentals of oxygen sensing measured by phase-resolved method (frequency domain).**

**Characterization of the oxygen-sensing films.**

### Figures:

**Figure ESI-1.** Chemical structure of the complexes.

**Figure ESI-2.** Schematic diagrams of the designed experimental setup for phase-shift measurements and the flow cell used.

**Figure ESI-3.** Luminescence spectra of N1008 and EB146.

**Figure ESI-4.** Selection of the modulation frequency using multifrequencies.

**Figure ESI-5.** Selection of the modulation frequency using the lock-in amplifier.

**Figure ESI-6.** Calibration of N1008 and EB146 with oxygen.

**Figure ESI-7.** Stability study.

### Tables:

**Table ESI-1.** Data of the selection of the optimal modulation frequency using using a multifrequency phase-resolved method.

**Tables ESI-2 to ESI-5.** Data of the selection of the optimal modulation frequency using the lock-in amplifier.

**Tables ESI-6 to ESI-12.** Data of the calibrations.

**Tables ESI-13 to ESI-21.** Data of the determination of ultra-low oxygen concentrations (between 0 and 0.26% pO<sub>2</sub>).

**Tables ESI-22 to ESI-25.** Data of the effect of relative humidity

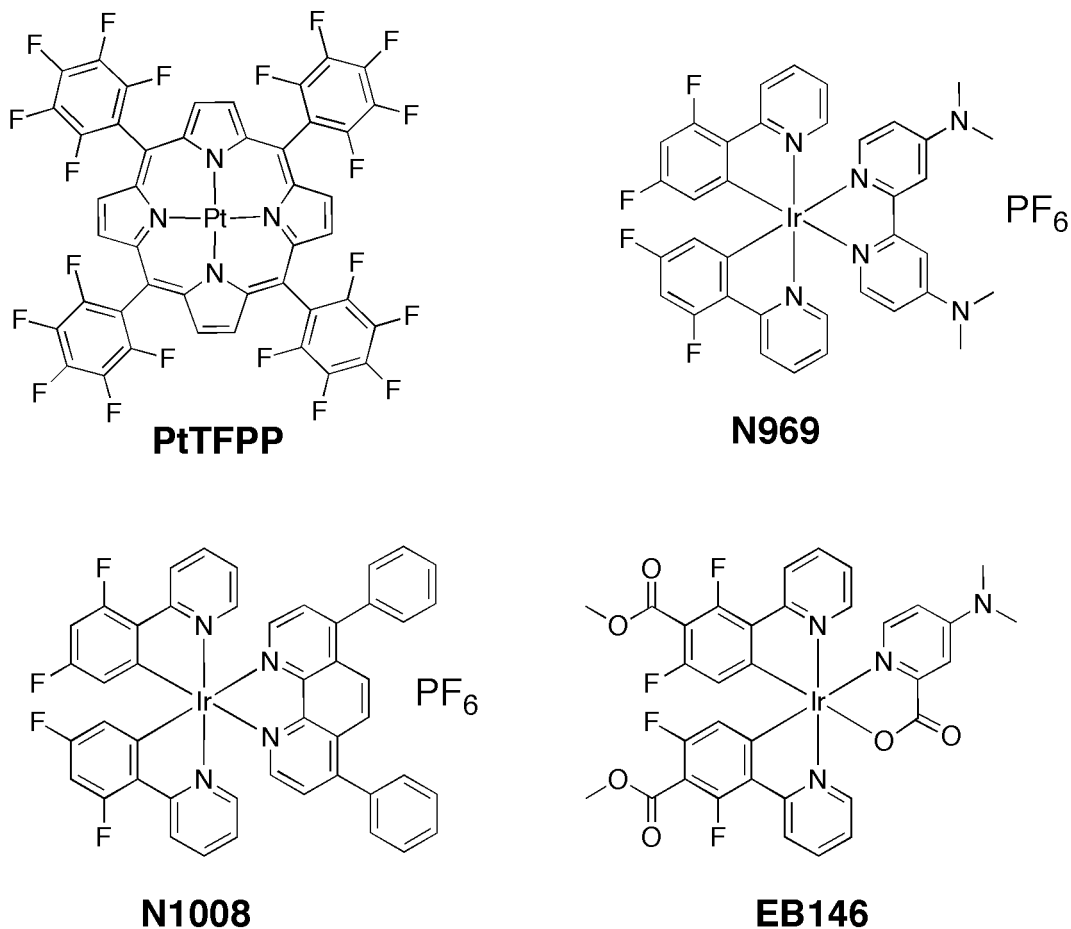

**Figure ESI-1.** Chemical structure of the complexes.

**PtTFPP:** Platinum(II) 5,10,15,20-meso-tetrakis-(2,3,4,5,6-pentafluorophenyl)-porphyrin)

**N969:** [Ir(2-(2,4-difluorophenyl)pyridine)<sub>2</sub>(4,4'-dimethylamino-2,2'-bipyridine)](PF<sub>6</sub>)

**N1008:** [Ir(2-(2,4-difluorophenyl)pyridine)<sub>2</sub>(4,7-diphenyl-1,10-phenanthroline)](PF<sub>6</sub>)

**EB146:** [Ir(2-(2,4-difluoro-3-methylesterphenyl)pyridine)<sub>2</sub>(4-(*N,N*-dimethylamino)picolinate)].

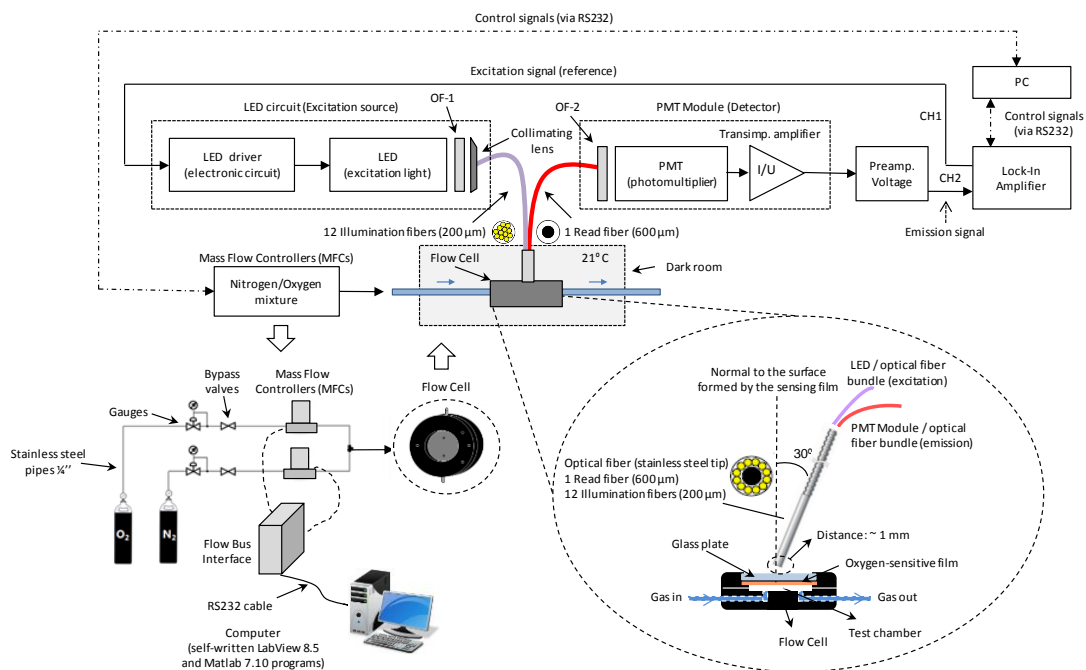

**Figure ESI-2.** Schematic diagrams of the designed experimental setup for phase-shift measurements and the flow cell used.

### Details of the homemade system to control oxygen and for lifetime measurements

The control of oxygen and lifetime measurements was carried out with a homemade system (see Figure ESI-1). For it, a flow-through cell, which functions as a gas chamber, was designed in our laboratories to hold the sensing films. The flow cell was made of black PTFE to prevent stray reflections and also to assure the chemical inertness. It was not thermostated since it was to be used in a constant temperature (in this case, all measurements were performed at room temperature of 21 °C). The temperature was continuously monitored using a commercial temperature sensor (MicroLite, Fourtec-Fourier Technologies, [www.fouriersystems.com](http://www.fouriersystems.com)) located at an external point close to the flow cell. Different mixtures of nitrogen and oxygen at a constant flow rate of 200 mL/min were passed through the flow cell to perform the calibration of the sensing films. For gas mixing, two mass flow controllers (MFCs) (EL-FLOW Select F-201CV, Bronkhorst High-Tech, [www.bronkhorst.com](http://www.bronkhorst.com), Ruurlo, Netherlands) were connected to copper and stainless steel tubing. These tubes connected the MFCs and the flow cell. The gas

station was completely controlled from a PC using an ad hoc computer program developed in LabView 8.5 ([www.ni.com](http://www.ni.com)) and MATLAB 7.10 ([www.mathworks.com](http://www.mathworks.com)) software. For it, the PC was connected to a Flow-Bus Interface (Bronkhorst High-Tech) that fully controls the MFCs via a RS-232 serial port.

For the study of the effect of relative humidity, one more MFC for nitrogen was added. Thus, nitrogen was split into two lines before two mass-flow controllers. One branch was humidified by guiding the nitrogen over water in a 2-neck glass flask, thus avoiding the formation of water droplets. A relative humidity (RH) of up to 80% was obtained. This was monitored with a hygrometer (Rotronic, Bassersdorf, [www.rotronic.ch](http://www.rotronic.ch)) coupled after the measurement cell. The two lines of nitrogen were merged to provide the desired carrier gas stream, to which an additional line carrying oxygen is connected.

For the study of the sensing response for concentrations lower than 0.25%, oxygen was replaced by synthetic air (21% O<sub>2</sub> balanced in N<sub>2</sub>).

The luminescence phase shifts were measured with a dual-phase lock-in amplifier (SR830, Stanford Research Systems, [www.thinksrs.com](http://www.thinksrs.com), USA).

The sensing films containing the iridium(III) complexes were excited with an ultraviolet light-emitting diode (LED) ( $\lambda_{\text{max}}$  375 nm, angle of illumination 15°, LED diameter 5 mm, luminous power 6800  $\mu\text{W}$  (max.) at 15 mA, LED Supply, [www.ledsupply.com](http://www.ledsupply.com), USA) filtered through an optical bandpass filter ( $\lambda_{\text{central}}$  390 nm, MF390-18, Thorlabs GmbH, [www.thorlabs.com](http://www.thorlabs.com)) which was sinusoidally modulated at a frequency of 94100 Hz (in the case of N969 and EB146) or at a frequency of 30100 Hz (in the case of N1008). The sensing film containing PtTFPP was excited with an ultraviolet LED ( $\lambda_{\text{max}}$  395 nm, angle of illumination 15°, LED diameter 5 mm, luminous power 25  $\mu\text{W}$ ) filtered through an optical bandpass filter ( $\lambda_{\text{central}}$  390 nm, MF390-18, Thorlabs GmbH) which was sinusoidally modulated at a frequency of 40100 Hz.

A bifurcated fibre bundle (wavelength range 200-800 nm UV-VIS, 12 illumination fibres 200  $\mu\text{m}$  core diameter, 1 read fibre 600  $\mu\text{m}$  core diameter, N.A. 0.22, FCR-7xx200-2, Avantes Inc., [www.avantes.com](http://www.avantes.com)) was used to guide the excitation light to the film and to guide back the luminescence after passing an optical longpass filter ( $\lambda_{\text{cut-on}}$  450 nm, NT62-975, Edmund Optics) in the case of Ir(III) complexes, or an optical bandpass filter ( $\lambda_{\text{central}}$  630 nm, BW 30 nm,

A10033-03, Hamamatsu Photonics) in the case of PtTFPP. The luminescence was detected with a photomultiplier tube (BW DC-1 MHz, H10723-20, Hamamatsu Photonics). The voltage signal provided by the PMT (of few tens of millivolts) was amplified with a commercial low-noise programmable voltage preamplifier (SIM911 BJT, Stanford Research Systems) before being applied to the lock-in amplifier. Both the flow cell and PMT were housed in a dark room (XE25C1, Thorlabs GmbH) to prevent interference from stray light.

## Fundamentals of oxygen sensing measured by phase-resolved method (frequency domain).

The oxygen quenching process is described by the Stern-Volmer equation (Equation ESI-1):

$$\frac{\tau_0}{\tau} = 1 + K_{SV}[O_2] \quad (\text{Equation ESI - 1})$$

where  $\tau_0$  and  $\tau$  are the unquenched and quenched excited state lifetimes,  $K_{SV}$  is the Stern-Volmer constant, and  $[O_2]$  is the concentration of quencher (oxygen).

However, in many cases it is usual to find some deviation from linearity of the response due to the heterogeneity of the matrix where the dyes are immobilized.<sup>1</sup> This deviation is explained by the presence of different oxygen quenching sites within the matrix,<sup>2, 3</sup> and therefore a multi-site model with each site having a linear behaviour can be applied. The simplest one is the two-site model proposed by Demas et al.,<sup>4</sup> the so-called Demas model. This model assumes localization of the indicator in two regions of different microenvironment and explains the deviation from the linearity in the Stern-Volmer plot. Thus, the experimental data can be nicely fitted with the following Equation ESI-2:

$$\frac{\tau_0}{\tau} = \left[ \frac{x_1}{1 + K_{SV1}[O_2]} + \frac{x_2}{1 + K_{SV2}[O_2]} \right]^{-1} \quad (\text{Equation ESI - 2})$$

where  $x_1$  and  $x_2$  are the fractions of the total emission for each component respectively (with  $x_1+x_2$  being 1), and  $K_{SV1}$  and  $K_{SV2}$  are the Stern-Volmer quenching constants for each component.

Other two-site model was proposed by Lehrer,<sup>5</sup> where only one of the two microenvironments is accessible to the quencher ( $K_{SV2}=0$ ). In this case, the experimental data can be fitted with the following Equation ESI-3:

$$\frac{\tau_0}{\tau} = \left[ \frac{x_0}{1 + K_{SV}[O_2]} + (1 - x_0) \right]^{-1} \quad (\text{Equation ESI - 3})$$

where  $x_0$  denotes the fraction of the total luminophores population that the quencher is able to access, and  $K_{SV}$  is the Stern-Volmer quenching constant associated with the accessible fraction of luminophores.

In phase-resolved method (frequency domain), the sample is excited with a sinusoidally modulated light at a fixed frequency that consequently causes a modulated luminescence emission at the identical frequency. Due to the emission lifetime of the luminescent material, the emission signal exhibits a phase shift (i.e., time delay) with respect to the excitation signal. The input excitation signal is used as a reference to establish the zero-phase position, and the lifetime is obtained indirectly by measuring the phase shift between excitation and emission signals.<sup>6</sup> If the luminescence emission is directly proportional to the intensity of the excitation light, and assuming that the luminescence decay is monoexponential (i.e., according to Equation ESI-1), the relationship between the phase shift,  $\phi$ , and the emission lifetime,  $\tau$ , is given by Equation ESI-3:<sup>7, 8</sup>

$$\tan(\phi) = 2\pi f\tau \quad (\text{Equation ESI - 4})$$

where  $\phi$  is the phase shift,  $f$  is the exciting light modulation frequency, and  $\tau$  is the decay time (or lifetime).

### **Characterization of the oxygen-sensing films**

Excitation and emission spectra were recorded with a Varian Cary-Eclipse luminescence spectrometer. The parameter settings for spectroscopic characterization were: slit-width<sub>exc/em</sub> 10/10 nm, delay time 0.1 ms, gate time 5 ms, constant flow rate of 200 mL min<sup>-1</sup>, and detector voltage 560 V (EB146), 550 V (N1008), 590 V (N969) and 440 V (PtTFPP). All measurements were performed in the absence (100% N<sub>2</sub>) and in the presence (100% O<sub>2</sub>) of oxygen and at 21 °C.

Luminescence lifetimes were determined in frequency domain, and they were calculated indirectly with the experimental setup represented in Figure ESI-1 by measuring the phase shift between the excitation and emission signals (see equation ESI-4).



A disadvantage of phase luminometry is that the SNR (signal to noise ratio) decreases with increasing modulation frequency (i.e., the amplitude of the optical signal (optical power) decreases with increasing of the modulation frequency of the LED), and since the phase sensitivity increases with modulation frequency,<sup>7</sup> an optimal frequency has to be selected.<sup>9, 10</sup> Furthermore, the choice of the optimal modulation frequency also depends on the sensing application (i.e., measurement range of interest) because the changes of the phase shift within a certain oxygen concentrations range depend on the excitation modulation frequency.<sup>11</sup> One choice to achieve maximum dynamic range for measuring the phase shift (or lifetime, see equation ESI-4) is to adjust the modulation frequency such that the phase difference between the extremes of the oxygen measurement range is maximized.<sup>11, 12</sup> This strategy was used in this work to select the optimal modulation frequency for a given range of oxygen concentrations (between 0 and 1% O<sub>2</sub> and between 0 and 10% O<sub>2</sub>).

Time trace curves were used to recorder the luminescence phase shifts at 14 different oxygen partial pressures between 0 and 100 kPa (or 0-100 vol. % pO<sub>2</sub>). These phase-shift measurements were used to obtain the typical calibration curves (i.e., Stern-Volmer Plots (SVP)). Fitting was performed using MATLAB 7.10 software between 0 and 1 kPa (or 0-1 vol. % pO<sub>2</sub>). 0 and 0 and 10 kPa (or 0-10 vol. % pO<sub>2</sub>). Furthermore, typical response-time curves were also obtained to determine the response times of the sensing films (i.e., rise and fall times to t<sub>95</sub>). All measurements were done in the absence of ambient light and at 21 °C.

The oxygen concentration of the gas passing through the flow cell was calculated in real-time from the measured oxygen/nitrogen flows provided by the MFCs. A total gas flow rate of 200 mL min<sup>-1</sup> was maintained in all gas measurements, assuming a constant environment pressure of 1000 mbar. Before starting the experiments, the MFCs were calibrated using a flow sensor.

## References ESI

1. J. F. Fernández-Sánchez, R. Cannas, S. Spichiger, R. Steiger and U. E. Spichiger-Keller, *Anal. Chim. Acta*, 2006, **566**, 271-282.
2. J. F. Fernández-Sánchez, T. Roth, R. Cannas, M. K. Nazeeruddin, S. Spichiger, M. Graetzel and U. E. Spichiger-Keller, *Talanta*, 2007, **71**, 242-250.
3. M. Marín-Suárez del Toro, J. F. Fernández-Sánchez, E. Baranoff, M. K. Nazeeruddin, M. Grätzel and A. Fernández-Gutiérrez, *Talanta*, 2010, **82**, 620-626.
4. J. N. Demas and B. A. DeGraff, *Sens. Actuators, B*, 1993, **11**, 35-41.
5. S. S. Lehrer, *Biochemistry*, 1971, **10**, 3254-3263.

6. D. Andrzejewski, I. Klimant and H. Podbielska, *Sens. Actuators, B*, 2002, **84**, 160-166.
7. J. R. Lakowicz, *Principles of Fluorescence Spectroscopy*, 2nd edn., Kluwer Academic, New York, 1999.
8. E. Crowell and L. Geng, *Appl. Spectrosc.*, 2001, **55**, 1709-1716.
9. C. McDonagh, C. Kolle, A. K. McEvoy, D. L. Dowling, A. A. Cafolla, S. J. Cullen and B. D. MacCraith, *Sens. Actuators, B*, 2001, **74**, 124-130.
10. S. Medina-Rodríguez, A. de la Torre-Vega, J. F. Fernández-Sánchez and A. Fernández-Gutiérrez, *Sensor Actuat. B*, 2013, **176**, 1110-1120.
11. V. I. Ogurtsov and D. B. Papkovsky, *Sens. Actuators, B*, 1998, **51**, 377-381.
12. G. O'Keeffe, B. D. MacCraith, A. K. McEvoy, C. M. McDonagh and J. F. McGilp, *Sens. Actuators, B*, 1995, **29**, 226-230.

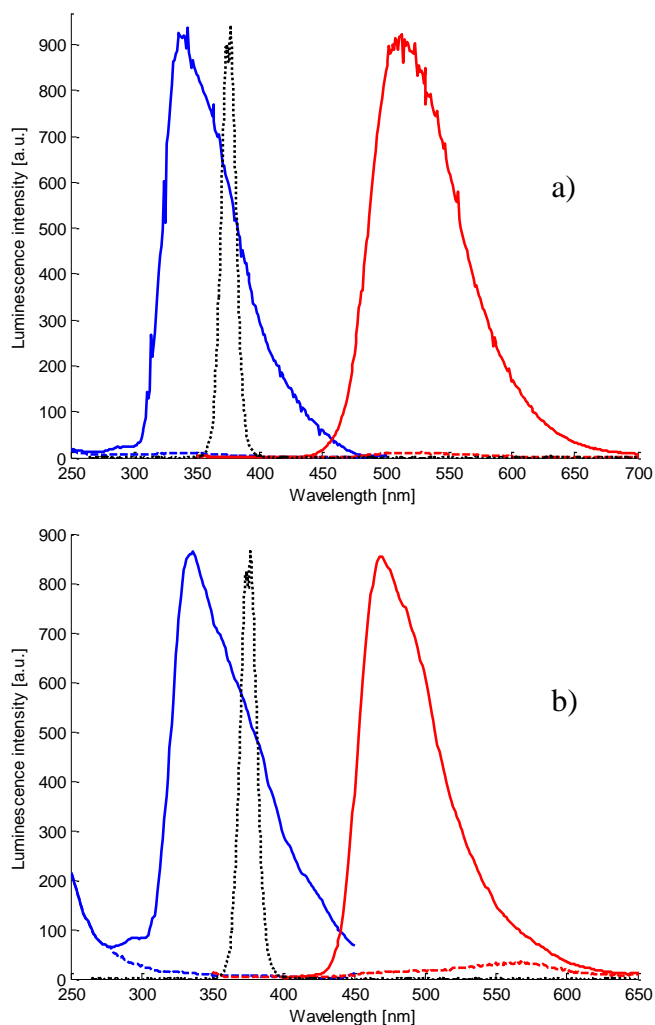

**Figure ESI-3.** Excitation (blue lines) and emission (red lines) spectra of in the absence (solid line) and in the presence (dashed line) of oxygen of a) N1008 and b) EB146 immobilized into AP200/19. The black dotted line (····) corresponds with the emission spectrum of the LED used for excited the sensing film. [Dye]=1.5 mg mL<sup>-1</sup>,  $\lambda_{exc}$ =340 nm for N1008 and 335 nm for EB146,  $\lambda_{em}$ =512 nm for N1008 and 470 nm for EB146, slits-width<sub>exc/em</sub>=10/10 nm, delay time=0.1 ms, gate time=5 ms, detector voltage=550 V for N1008 and 560 V for EB146, flow-rate 200 mL min<sup>-1</sup>

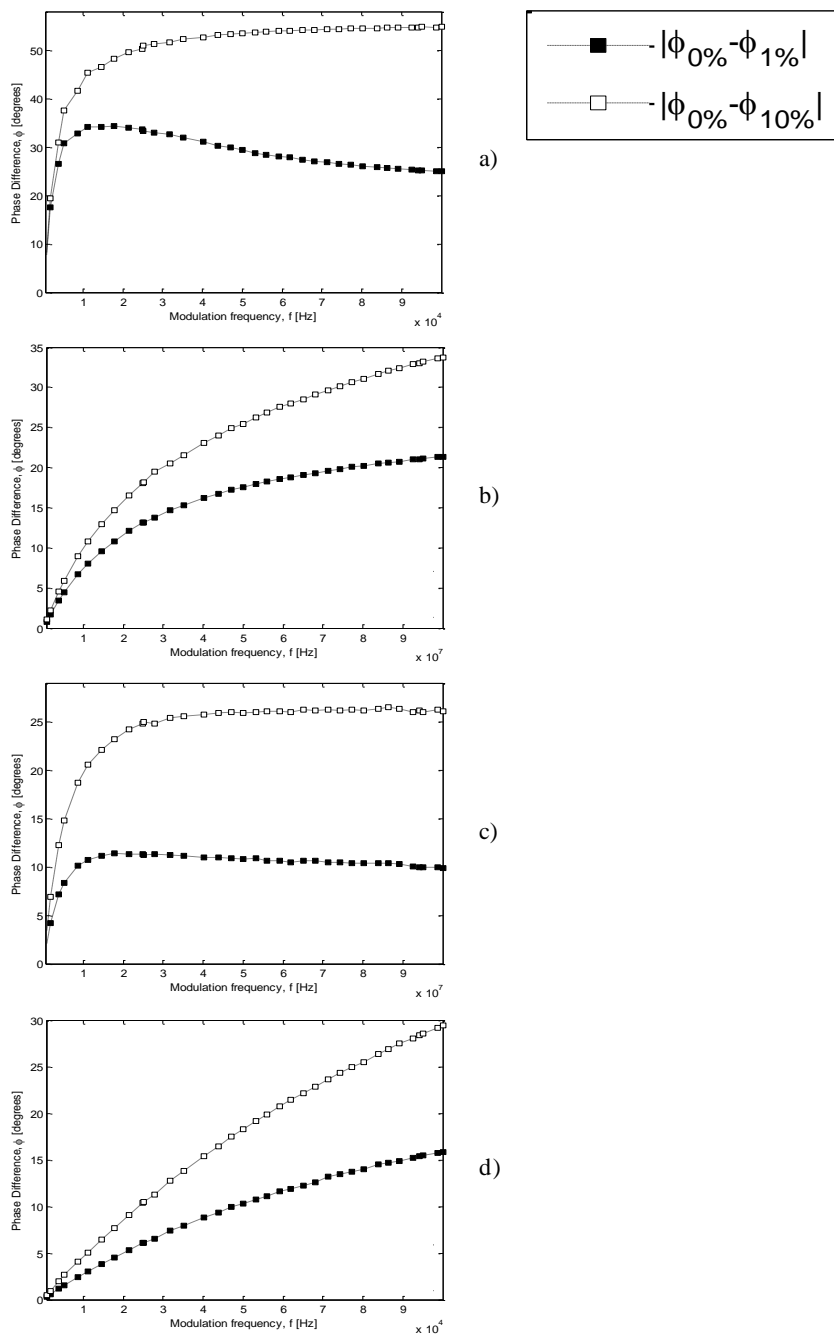

**Figure ESI-4.** Effect of the modulation frequency on the phase difference at several oxygen concentrations (■ from 0 to 1%  $O_2$  and □ from 0 to 10%  $O_2$ ) for a) PtTFPP, b) N969, c) N1008 and d) EB146 incorporated into AP200/19 using a multifrequency phase-resolved method. (see reference Sens. Actuators B 176 (2013) 1110-1120). See Table ESI-1 for the data.

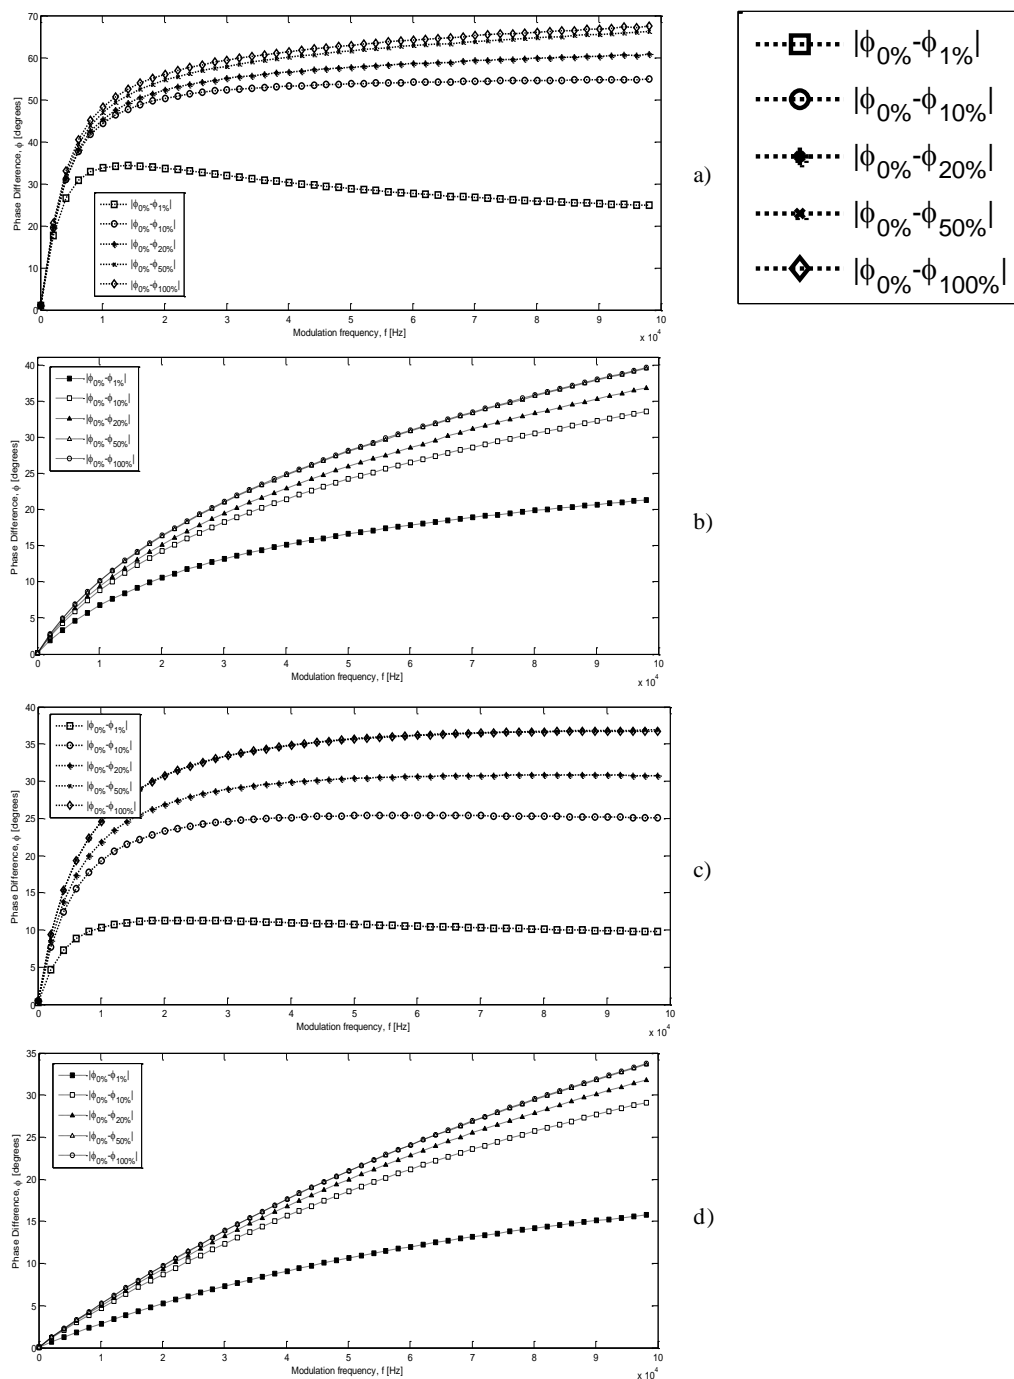

**Figure ESI-5.** Effect of the modulation frequency on the phase difference at several oxygen concentrations ( $\blacksquare$  from 0 to 1%  $O_2$ ,  $\square$  from 0 to 10%  $O_2$ ,  $\blacktriangle$  from 0 to 20%  $O_2$ ,  $\triangle$  from 0 to 50%  $O_2$ ,  $\circ$  from 0 to 100%  $O_2$ ) for a) PtTFPP, b) N969, c) N1008 and d) EB146 incorporated into AP200/19 measured with the setup described in Fig 1. See Tables ESI-2 to ESI-5 for the data.

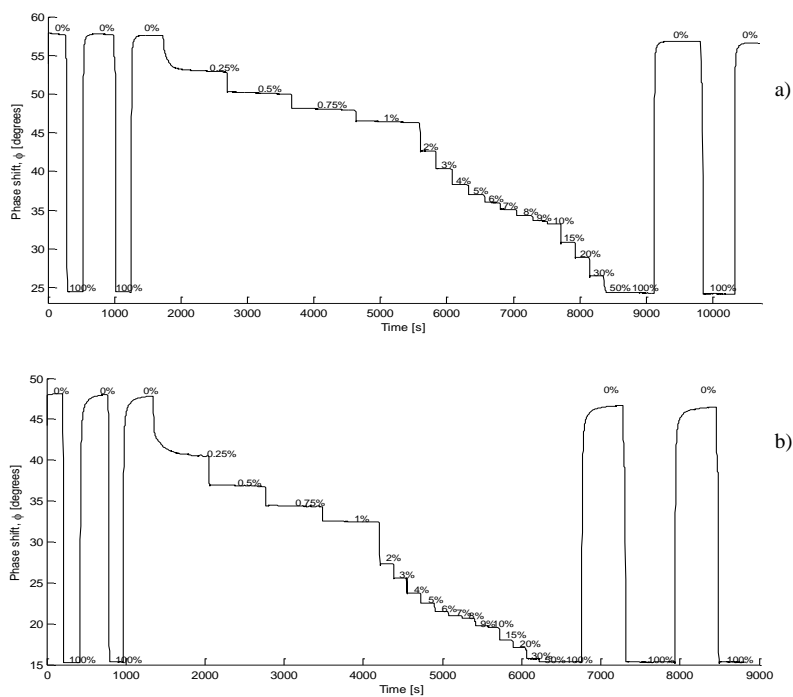

**Figure ESI-6.** Variation of the phase shift of a) N1008 and b) EB146 incorporated into AP200/19 with the oxygen concentration.

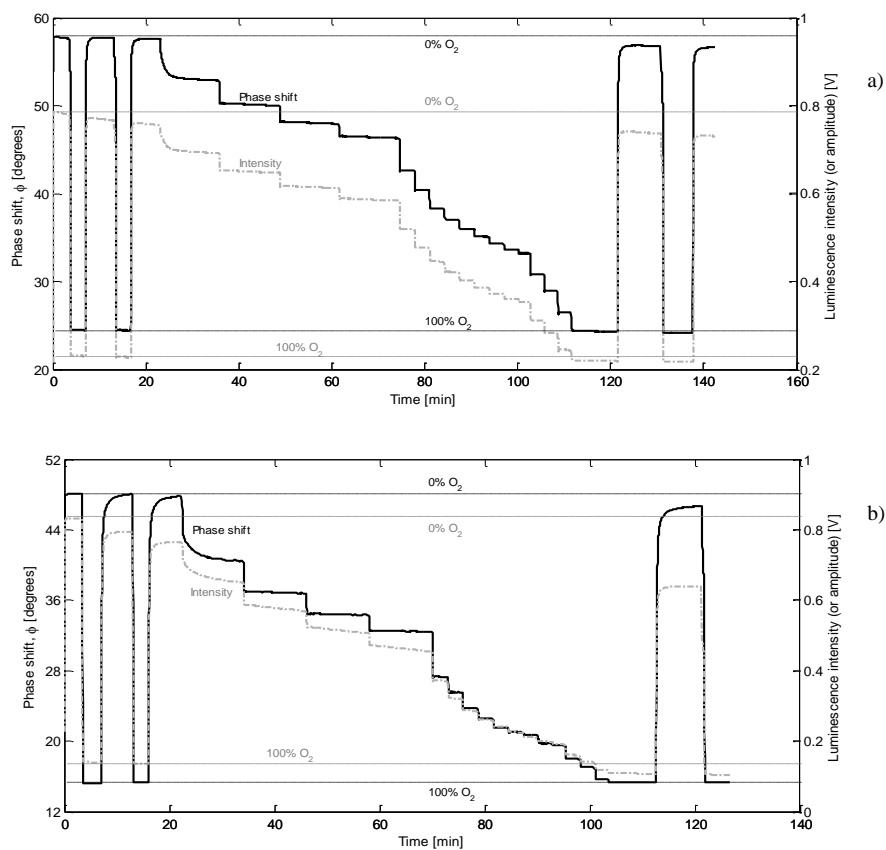

**Figure ESI-7.** Stability of the phase shift (dark bold line) and amplitude (dotted light line) for a) N1008 and b) EB146 incorporated into AP200/19 at 21 °C.

**Table ESI-1.** Average phase differences ( $|\Phi_{0\% O_2} - \Phi_{x\% O_2}|$ ) in degrees for several oxygen concentrations at different modulation frequencies obtained with the multifrequency phase-resolved method reported in Sens. Actuators B 176 (2013) 1110-1120. All the values correspond to the average value of 20 phase-shift measurements.

| Freq.<br>(Hz) | PtTFPP-AP200/19        |                         | N1008-AP200/19         |                         | N969-AP200/19          |                         | EB146-AP200/19         |                         |
|---------------|------------------------|-------------------------|------------------------|-------------------------|------------------------|-------------------------|------------------------|-------------------------|
|               | $ \Phi_{0\%-1\% O_2} $ | $ \Phi_{0\%-10\% O_2} $ | $ \Phi_{0\%-1\% O_2} $ | $ \Phi_{0\%-10\% O_2} $ | $ \Phi_{0\%-1\% O_2} $ | $ \Phi_{0\%-10\% O_2} $ | $ \Phi_{0\%-1\% O_2} $ | $ \Phi_{0\%-10\% O_2} $ |
| 769           | 7.78                   | 8.29                    | 2.06                   | 3.41                    | 0.77                   | 1.02                    | 0.32                   | 0.50                    |
| 1709          | 17.60                  | 19.50                   | 4.17                   | 6.92                    | 1.67                   | 2.19                    | 0.59                   | 0.94                    |
| 3761          | 26.52                  | 31.02                   | 7.14                   | 12.27                   | 3.45                   | 4.55                    | 1.14                   | 1.97                    |
| 5145          | 30.77                  | 37.62                   | 8.34                   | 14.80                   | 4.48                   | 5.89                    | 1.52                   | 2.63                    |
| 8713          | 32.80                  | 41.69                   | 10.15                  | 18.72                   | 6.71                   | 8.91                    | 2.40                   | 4.10                    |
| 11257         | 34.20                  | 45.43                   | 10.75                  | 20.52                   | 8.06                   | 10.78                   | 3.00                   | 5.04                    |
| 14639         | 34.20                  | 46.63                   | 11.16                  | 22.08                   | 9.57                   | 12.93                   | 3.79                   | 6.45                    |
| 17881         | 34.27                  | 48.23                   | 11.39                  | 23.18                   | 10.82                  | 14.72                   | 4.48                   | 7.66                    |
| 21499         | 33.97                  | 49.66                   | 11.29                  | 24.18                   | 12.12                  | 16.55                   | 5.29                   | 9.06                    |
| 24917         | 33.68                  | 50.34                   | 11.29                  | 24.77                   | 13.12                  | 18.07                   | 6.06                   | 10.39                   |
| 25111         | 33.36                  | 50.90                   | 11.21                  | 24.96                   | 13.15                  | 18.15                   | 6.09                   | 10.45                   |
| 27847         | 32.99                  | 51.32                   | 11.29                  | 24.77                   | 13.77                  | 19.46                   | 6.55                   | 11.27                   |
| 31849         | 32.61                  | 51.67                   | 11.20                  | 25.42                   | 14.68                  | 20.55                   | 7.39                   | 12.75                   |
| 35129         | 31.89                  | 52.31                   | 11.18                  | 25.53                   | 15.32                  | 21.55                   | 7.96                   | 13.80                   |
| 40277         | 31.20                  | 52.74                   | 10.94                  | 25.71                   | 16.17                  | 23.06                   | 8.79                   | 15.36                   |
| 43777         | 30.23                  | 53.20                   | 11.01                  | 25.93                   | 16.69                  | 23.98                   | 9.36                   | 16.43                   |
| 47143         | 29.98                  | 53.33                   | 10.90                  | 25.94                   | 17.22                  | 24.88                   | 9.95                   | 17.50                   |
| 50023         | 29.37                  | 53.55                   | 10.82                  | 25.94                   | 17.56                  | 25.47                   | 10.33                  | 18.25                   |
| 53309         | 28.83                  | 53.74                   | 10.85                  | 25.99                   | 17.91                  | 26.24                   | 10.74                  | 19.15                   |
| 56087         | 28.35                  | 53.91                   | 10.68                  | 26.11                   | 18.21                  | 26.82                   | 11.14                  | 19.87                   |
| 59183         | 28.12                  | 54.01                   | 10.68                  | 26.08                   | 18.52                  | 27.54                   | 11.61                  | 20.78                   |
| 62011         | 27.94                  | 54.06                   | 10.48                  | 26.00                   | 18.81                  | 27.99                   | 11.86                  | 21.48                   |
| 65071         | 27.45                  | 54.16                   | 10.65                  | 26.26                   | 19.08                  | 28.54                   | 12.20                  | 22.14                   |
| 68071         | 27.03                  | 54.24                   | 10.62                  | 26.17                   | 19.30                  | 29.06                   | 12.56                  | 22.86                   |
| 71327         | 26.89                  | 54.27                   | 10.45                  | 26.22                   | 19.63                  | 29.61                   | 13.21                  | 23.66                   |
| 74257         | 26.59                  | 54.42                   | 10.44                  | 26.14                   | 19.84                  | 30.15                   | 13.48                  | 24.34                   |
| 77291         | 26.43                  | 54.50                   | 10.37                  | 26.20                   | 20.11                  | 30.68                   | 13.74                  | 24.95                   |
| 80191         | 26.06                  | 54.46                   | 10.34                  | 26.13                   | 20.19                  | 31.02                   | 14.02                  | 25.50                   |
| 83843         | 25.91                  | 54.51                   | 10.40                  | 26.28                   | 20.48                  | 31.64                   | 14.50                  | 26.37                   |
| 86413         | 25.65                  | 54.61                   | 10.43                  | 26.53                   | 20.62                  | 32.04                   | 14.71                  | 26.85                   |
| 89231         | 25.53                  | 54.65                   | 10.33                  | 26.30                   | 20.77                  | 32.40                   | 14.88                  | 27.45                   |
| 92647         | 25.31                  | 54.69                   | 10.08                  | 25.96                   | 21.01                  | 32.91                   | 15.18                  | 28.06                   |
| 94111         | 25.17                  | 54.72                   | 9.96                   | 26.19                   | 21.03                  | 32.97                   | 15.43                  | 28.40                   |
| 95101         | 25.16                  | 54.79                   | 9.95                   | 25.96                   | 21.10                  | 33.20                   | 15.48                  | 28.56                   |
| 98809         | 24.97                  | 54.73                   | 9.97                   | 26.21                   | 21.34                  | 33.66                   | 15.72                  | 29.17                   |
| 99991         | 24.95                  | 54.86                   | 9.83                   | 26.06                   | 21.34                  | 33.75                   | 15.83                  | 29.39                   |



**Table ESI-2.** Average phase differences ( $|\Phi_{0\% \text{ O}_2} - \Phi_{x\% \text{ O}_2}|$ ) for several oxygen concentrations at different modulation frequencies obtained for PtTFPP immobilized into AP200/19 measured with the setup described in Figure 1. All the values correspond to the average value of 100 phase-shift measurements.

| Freq.<br>(Hz) | $ \Phi_{0\% - x\% \text{ O}_2} $ (degrees) |                      |                      |                      |                       | Freq.<br>(Hz) | $ \Phi_{0\% - x\% \text{ O}_2} $ (degrees) |                      |                      |                      |                       |
|---------------|--------------------------------------------|----------------------|----------------------|----------------------|-----------------------|---------------|--------------------------------------------|----------------------|----------------------|----------------------|-----------------------|
|               | x=1% O <sub>2</sub>                        | x=10% O <sub>2</sub> | x=20% O <sub>2</sub> | x=50% O <sub>2</sub> | x=100% O <sub>2</sub> |               | x=1% O <sub>2</sub>                        | x=10% O <sub>2</sub> | x=20% O <sub>2</sub> | x=50% O <sub>2</sub> | x=100% O <sub>2</sub> |
| 100           | 0.953                                      | 0.952                | 1.019                | 1.070                | 1.173                 | 50100         | 28.836                                     | 53.745               | 57.715               | 61.603               | 62.955                |
| 2100          | 17.606                                     | 19.506               | 19.524               | 20.133               | 20.697                | 52100         | 28.585                                     | 53.864               | 57.880               | 61.869               | 63.191                |
| 4100          | 26.527                                     | 31.028               | 31.236               | 32.232               | 33.129                | 54100         | 28.356                                     | 53.912               | 58.061               | 62.066               | 63.483                |
| 6100          | 30.775                                     | 37.629               | 38.087               | 39.356               | 40.419                | 56100         | 28.126                                     | 54.011               | 58.235               | 62.333               | 63.746                |
| 8100          | 32.803                                     | 41.691               | 42.438               | 43.860               | 45.081                | 58100         | 27.942                                     | 54.068               | 58.493               | 62.645               | 64.025                |
| 10100         | 33.810                                     | 44.418               | 45.360               | 47.019               | 48.264                | 60100         | 27.688                                     | 54.143               | 58.594               | 62.793               | 64.210                |
| 12100         | 34.206                                     | 46.339               | 47.479               | 49.301               | 50.636                | 62100         | 27.458                                     | 54.164               | 58.674               | 62.963               | 64.268                |
| 14100         | 34.277                                     | 47.738               | 49.104               | 51.042               | 52.409                | 64100         | 27.272                                     | 54.155               | 58.841               | 63.222               | 64.582                |
| 16100         | 34.178                                     | 48.844               | 50.381               | 52.545               | 53.917                | 66100         | 27.034                                     | 54.241               | 58.886               | 63.329               | 64.705                |
| 18100         | 33.976                                     | 49.663               | 51.418               | 53.689               | 55.084                | 68100         | 26.895                                     | 54.276               | 59.133               | 63.537               | 64.934                |
| 20100         | 33.685                                     | 50.346               | 52.238               | 54.651               | 56.099                | 70100         | 26.718                                     | 54.283               | 59.272               | 63.759               | 65.189                |
| 22100         | 33.367                                     | 50.902               | 52.969               | 55.493               | 56.910                | 72100         | 26.593                                     | 54.426               | 59.383               | 64.036               | 65.400                |
| 24100         | 32.999                                     | 51.327               | 53.561               | 56.232               | 57.625                | 74100         | 26.434                                     | 54.503               | 59.498               | 64.188               | 65.585                |
| 26100         | 32.618                                     | 51.673               | 54.107               | 56.958               | 58.273                | 76100         | 26.227                                     | 54.462               | 59.627               | 64.387               | 65.719                |
| 28100         | 32.301                                     | 52.040               | 54.601               | 57.451               | 58.906                | 78100         | 26.064                                     | 54.467               | 59.670               | 64.548               | 65.889                |
| 30100         | 31.890                                     | 52.311               | 55.002               | 57.935               | 59.329                | 80100         | 25.914                                     | 54.517               | 59.903               | 64.661               | 66.001                |
| 32100         | 31.552                                     | 52.556               | 55.387               | 58.403               | 59.817                | 82100         | 25.791                                     | 54.625               | 59.948               | 64.910               | 66.224                |
| 34100         | 31.203                                     | 52.749               | 55.726               | 58.933               | 60.312                | 84100         | 25.659                                     | 54.612               | 60.130               | 64.988               | 66.311                |
| 36100         | 30.894                                     | 52.922               | 56.042               | 59.325               | 60.740                | 86100         | 25.539                                     | 54.652               | 60.149               | 65.197               | 66.443                |
| 38100         | 30.571                                     | 53.090               | 56.312               | 59.729               | 61.100                | 88100         | 25.392                                     | 54.668               | 60.295               | 65.374               | 66.668                |
| 40100         | 30.232                                     | 53.207               | 56.603               | 60.020               | 61.362                | 90100         | 25.314                                     | 54.697               | 60.298               | 65.450               | 66.804                |
| 42100         | 29.984                                     | 53.331               | 56.835               | 60.431               | 61.795                | 92100         | 25.179                                     | 54.727               | 60.470               | 65.704               | 66.939                |
| 44100         | 29.662                                     | 53.454               | 57.098               | 60.727               | 62.118                | 94100         | 25.169                                     | 54.799               | 60.593               | 65.833               | 67.230                |
| 46100         | 29.373                                     | 53.554               | 57.279               | 60.976               | 62.399                | 96100         | 24.972                                     | 54.731               | 60.518               | 65.989               | 67.167                |
| 48100         | 29.106                                     | 53.672               | 57.575               | 61.355               | 62.677                | 98100         | 24.951                                     | 54.867               | 60.804               | 66.113               | 67.461                |

**Table ESI-3.** Average phase differences ( $|\Phi_{0\% O_2} - \Phi_{x\% O_2}|$ ) for several oxygen concentrations at different modulation frequencies obtained for N969 immobilized into AP200/19 measured with the setup described in Figure 1. All the values correspond to the average value of 100 phase-shift measurements.

| Freq.<br>(Hz) | $ \Phi_{0\% O_2} - \Phi_{x\% O_2} $ (degrees) |                      |                      |                      |                       | Freq.<br>(Hz) | $ \Phi_{0\% O_2} - \Phi_{x\% O_2} $ (degrees) |                      |                      |                      |                       |
|---------------|-----------------------------------------------|----------------------|----------------------|----------------------|-----------------------|---------------|-----------------------------------------------|----------------------|----------------------|----------------------|-----------------------|
|               | x=1% O <sub>2</sub>                           | x=10% O <sub>2</sub> | x=20% O <sub>2</sub> | x=50% O <sub>2</sub> | x=100% O <sub>2</sub> |               | x=1% O <sub>2</sub>                           | x=10% O <sub>2</sub> | x=20% O <sub>2</sub> | x=50% O <sub>2</sub> | x=100% O <sub>2</sub> |
| 100           | 0.135                                         | 0.168                | 0.181                | 0.189                | 0.183                 | 50100         | 16.612                                        | 24.190               | 25.948               | 27.987               | 28.116                |
| 2100          | 1.874                                         | 2.394                | 2.570                | 2.764                | 2.782                 | 52100         | 16.868                                        | 24.667               | 26.487               | 28.569               | 28.709                |
| 4100          | 3.321                                         | 4.272                | 4.565                | 4.925                | 4.950                 | 54100         | 17.125                                        | 25.155               | 27.014               | 29.155               | 29.283                |
| 6100          | 4.592                                         | 5.941                | 6.347                | 6.836                | 6.880                 | 56100         | 17.366                                        | 25.629               | 27.538               | 29.704               | 29.845                |
| 8100          | 5.718                                         | 7.439                | 7.936                | 8.553                | 8.605                 | 58100         | 17.616                                        | 26.091               | 28.054               | 30.276               | 30.408                |
| 10100         | 6.729                                         | 8.803                | 9.388                | 10.116               | 10.170                | 60100         | 17.849                                        | 26.532               | 28.550               | 30.815               | 30.934                |
| 12100         | 7.636                                         | 10.047               | 10.700               | 11.536               | 11.605                | 62100         | 18.076                                        | 26.971               | 29.035               | 31.351               | 31.480                |
| 14100         | 8.460                                         | 11.189               | 11.919               | 12.852               | 12.934                | 64100         | 18.285                                        | 27.386               | 29.586               | 31.871               | 31.995                |
| 16100         | 9.213                                         | 12.260               | 13.057               | 14.069               | 14.158                | 66100         | 18.495                                        | 27.818               | 30.236               | 32.368               | 32.512                |
| 18100         | 9.912                                         | 13.272               | 14.133               | 15.235               | 15.327                | 68100         | 18.710                                        | 28.229               | 30.692               | 32.883               | 33.013                |
| 20100         | 10.561                                        | 14.210               | 15.133               | 16.319               | 16.415                | 70100         | 18.910                                        | 28.629               | 31.146               | 33.381               | 33.499                |
| 22100         | 11.157                                        | 15.100               | 16.084               | 17.336               | 17.449                | 72100         | 19.109                                        | 29.022               | 31.595               | 33.851               | 33.978                |
| 24100         | 11.714                                        | 15.951               | 16.995               | 18.325               | 18.434                | 74100         | 19.293                                        | 29.394               | 32.016               | 34.328               | 34.447                |
| 26100         | 12.232                                        | 16.744               | 17.855               | 19.250               | 19.362                | 76100         | 19.487                                        | 29.786               | 32.468               | 34.800               | 34.906                |
| 28100         | 12.711                                        | 17.502               | 18.663               | 20.128               | 20.242                | 78100         | 19.683                                        | 30.161               | 32.890               | 35.243               | 35.370                |
| 30100         | 13.169                                        | 18.238               | 19.456               | 20.984               | 21.094                | 80100         | 19.850                                        | 30.531               | 33.304               | 35.707               | 35.817                |
| 32100         | 13.605                                        | 18.941               | 20.222               | 21.809               | 21.919                | 82100         | 20.022                                        | 30.877               | 33.696               | 36.130               | 36.244                |
| 34100         | 14.013                                        | 19.601               | 20.942               | 22.590               | 22.700                | 84100         | 20.190                                        | 31.238               | 34.104               | 36.580               | 36.690                |
| 36100         | 14.391                                        | 20.248               | 21.635               | 23.335               | 23.458                | 86100         | 20.373                                        | 31.591               | 34.493               | 37.031               | 37.116                |
| 38100         | 14.756                                        | 20.875               | 22.318               | 24.077               | 24.193                | 88100         | 20.546                                        | 31.951               | 34.915               | 37.454               | 37.563                |
| 40100         | 15.107                                        | 21.468               | 22.972               | 24.773               | 24.890                | 90100         | 20.712                                        | 32.277               | 35.294               | 37.878               | 37.975                |
| 42100         | 15.427                                        | 22.043               | 23.597               | 25.445               | 25.579                | 92100         | 20.878                                        | 32.637               | 35.712               | 38.304               | 38.413                |
| 44100         | 15.733                                        | 22.602               | 24.201               | 26.112               | 26.235                | 94100         | 21.033                                        | 32.972               | 36.077               | 38.711               | 38.823                |
| 46100         | 16.046                                        | 23.148               | 24.798               | 26.751               | 26.888                | 96100         | 21.184                                        | 33.279               | 36.446               | 39.119               | 39.209                |
| 48100         | 16.328                                        | 23.678               | 25.391               | 27.384               | 27.517                | 98100         | 21.342                                        | 33.595               | 36.804               | 39.533               | 39.620                |

**Table ESI-4.** Average phase differences ( $|\Phi_{0\% \text{ O}_2} - \Phi_{x\% \text{ O}_2}|$ ) for several oxygen concentrations at different modulation frequencies obtained for N1008 immobilized into AP200/19 measured with the setup described in Figure 1. All the values correspond to the average value of 100 phase-shift measurements.

| Freq.<br>(Hz) | $ \Phi_{0\% \text{ O}_2} - \Phi_{x\% \text{ O}_2} $ (degrees) |                      |                      |                      |                       | Freq.<br>(Hz) | $ \Phi_{0\% \text{ O}_2} - \Phi_{x\% \text{ O}_2} $ (degrees) |                      |                      |                      |                       |
|---------------|---------------------------------------------------------------|----------------------|----------------------|----------------------|-----------------------|---------------|---------------------------------------------------------------|----------------------|----------------------|----------------------|-----------------------|
|               | x=1% O <sub>2</sub>                                           | x=10% O <sub>2</sub> | x=20% O <sub>2</sub> | x=50% O <sub>2</sub> | x=100% O <sub>2</sub> |               | x=1% O <sub>2</sub>                                           | x=10% O <sub>2</sub> | x=20% O <sub>2</sub> | x=50% O <sub>2</sub> | x=100% O <sub>2</sub> |
| 100           | 0.271                                                         | 0.428                | 0.471                | 0.508                | 0.507                 | 50100         | 10.747                                                        | 25.343               | 30.383               | 35.707               | 35.649                |
| 2100          | 4.667                                                         | 7.703                | 8.507                | 9.448                | 9.389                 | 52100         | 10.688                                                        | 25.355               | 30.442               | 35.815               | 35.770                |
| 4100          | 7.258                                                         | 12.394               | 13.784               | 15.361               | 15.289                | 54100         | 10.640                                                        | 25.368               | 30.498               | 35.930               | 35.868                |
| 6100          | 8.797                                                         | 15.522               | 17.369               | 19.438               | 19.359                | 56100         | 10.595                                                        | 25.383               | 30.567               | 36.037               | 35.983                |
| 8100          | 9.747                                                         | 17.720               | 19.944               | 22.405               | 22.321                | 58100         | 10.543                                                        | 25.384               | 30.603               | 36.118               | 36.066                |
| 10100         | 10.354                                                        | 19.330               | 21.871               | 24.665               | 24.580                | 60100         | 10.502                                                        | 25.379               | 30.640               | 36.212               | 36.150                |
| 12100         | 10.739                                                        | 20.538               | 23.361               | 26.424               | 26.344                | 62100         | 10.463                                                        | 25.382               | 30.676               | 36.277               | 36.228                |
| 14100         | 10.991                                                        | 21.470               | 24.538               | 27.849               | 27.772                | 64100         | 10.415                                                        | 25.378               | 30.705               | 36.352               | 36.277                |
| 16100         | 11.141                                                        | 22.197               | 25.481               | 29.005               | 28.931                | 66100         | 10.366                                                        | 25.361               | 30.737               | 36.414               | 36.355                |
| 18100         | 11.235                                                        | 22.780               | 26.250               | 29.973               | 29.899                | 68100         | 10.318                                                        | 25.352               | 30.748               | 36.465               | 36.394                |
| 20100         | 11.283                                                        | 23.249               | 26.898               | 30.794               | 30.730                | 70100         | 10.276                                                        | 25.343               | 30.766               | 36.526               | 36.455                |
| 22100         | 11.301                                                        | 23.628               | 27.427               | 31.481               | 31.426                | 72100         | 10.239                                                        | 25.323               | 30.775               | 36.563               | 36.489                |
| 24100         | 11.305                                                        | 23.940               | 27.888               | 32.085               | 32.023                | 74100         | 10.215                                                        | 25.331               | 30.812               | 36.622               | 36.548                |
| 26100         | 11.287                                                        | 24.201               | 28.283               | 32.596               | 32.545                | 76100         | 10.162                                                        | 25.308               | 30.807               | 36.643               | 36.573                |
| 28100         | 11.255                                                        | 24.410               | 28.611               | 33.043               | 33.000                | 78100         | 10.124                                                        | 25.280               | 30.809               | 36.684               | 36.611                |
| 30100         | 11.223                                                        | 24.596               | 28.905               | 33.455               | 33.403                | 80100         | 10.090                                                        | 25.269               | 30.817               | 36.718               | 36.622                |
| 32100         | 11.180                                                        | 24.739               | 29.150               | 33.803               | 33.747                | 82100         | 10.043                                                        | 25.261               | 30.824               | 36.750               | 36.662                |
| 34100         | 11.131                                                        | 24.859               | 29.365               | 34.117               | 34.068                | 84100         | 10.009                                                        | 25.213               | 30.818               | 36.772               | 36.689                |
| 36100         | 11.079                                                        | 24.963               | 29.555               | 34.404               | 34.341                | 86100         | 9.965                                                         | 25.197               | 30.822               | 36.782               | 36.672                |
| 38100         | 11.032                                                        | 25.064               | 29.726               | 34.652               | 34.605                | 88100         | 9.922                                                         | 25.166               | 30.811               | 36.811               | 36.713                |
| 40100         | 10.987                                                        | 25.130               | 29.869               | 34.883               | 34.824                | 90100         | 9.911                                                         | 25.168               | 30.830               | 36.830               | 36.738                |
| 42100         | 10.932                                                        | 25.185               | 30.000               | 35.071               | 35.029                | 92100         | 9.884                                                         | 25.136               | 30.799               | 36.854               | 36.737                |
| 44100         | 10.886                                                        | 25.236               | 30.115               | 35.246               | 35.204                | 94100         | 9.833                                                         | 25.098               | 30.781               | 36.844               | 36.731                |
| 46100         | 10.843                                                        | 25.281               | 30.215               | 35.421               | 35.366                | 96100         | 9.800                                                         | 25.091               | 30.776               | 36.863               | 36.750                |
| 48100         | 10.790                                                        | 25.314               | 30.306               | 35.568               | 35.519                | 98100         | 9.779                                                         | 25.057               | 30.770               | 36.859               | 36.748                |

**Table ESI-5.** Average phase differences ( $|\Phi_{0\% \text{ O}_2} - \Phi_{x\% \text{ O}_2}|$ ) for several oxygen concentrations at different modulation frequencies obtained for EB146 immobilized into AP200/19 measured with the setup described in Figure 1. All the values correspond to the average value of 100 phase-shift measurements.

| Freq.<br>(Hz) | $ \Phi_{0\% \text{ O}_2} - \Phi_{x\% \text{ O}_2} $ (degrees) |                      |                      |                      |                       | Freq.<br>(Hz) | $ \Phi_{0\% \text{ O}_2} - \Phi_{x\% \text{ O}_2} $ (degrees) |                      |                      |                      |                       |
|---------------|---------------------------------------------------------------|----------------------|----------------------|----------------------|-----------------------|---------------|---------------------------------------------------------------|----------------------|----------------------|----------------------|-----------------------|
|               | x=1% O <sub>2</sub>                                           | x=10% O <sub>2</sub> | x=20% O <sub>2</sub> | x=50% O <sub>2</sub> | x=100% O <sub>2</sub> |               | x=1% O <sub>2</sub>                                           | x=10% O <sub>2</sub> | x=20% O <sub>2</sub> | x=50% O <sub>2</sub> | x=100% O <sub>2</sub> |
| 100           | 0.038                                                         | 0.051                | 0.051                | 0.005                | 0.035                 | 50100         | 10.662                                                        | 18.571               | 19.996               | 21.003               | 21.029                |
| 2100          | 0.727                                                         | 1.140                | 1.211                | 1.244                | 1.241                 | 52100         | 10.938                                                        | 19.115               | 20.596               | 21.643               | 21.657                |
| 4100          | 1.297                                                         | 2.080                | 2.210                | 2.312                | 2.289                 | 54100         | 11.214                                                        | 19.646               | 21.191               | 22.268               | 22.293                |
| 6100          | 1.842                                                         | 2.982                | 3.176                | 3.297                | 3.304                 | 56100         | 11.485                                                        | 20.176               | 21.768               | 22.870               | 22.912                |
| 8100          | 2.363                                                         | 3.854                | 4.104                | 4.273                | 4.267                 | 58100         | 11.736                                                        | 20.695               | 22.328               | 23.467               | 23.517                |
| 10100         | 2.871                                                         | 4.709                | 5.019                | 5.236                | 5.220                 | 60100         | 11.996                                                        | 21.192               | 22.890               | 24.073               | 24.102                |
| 12100         | 3.371                                                         | 5.546                | 5.913                | 6.182                | 6.157                 | 62100         | 12.247                                                        | 21.693               | 23.439               | 24.672               | 24.713                |
| 14100         | 3.857                                                         | 6.365                | 6.788                | 7.082                | 7.088                 | 64100         | 12.482                                                        | 22.175               | 23.983               | 25.235               | 25.268                |
| 16100         | 4.335                                                         | 7.172                | 7.649                | 8.000                | 7.988                 | 66100         | 12.712                                                        | 22.638               | 24.493               | 25.778               | 25.838                |
| 18100         | 4.793                                                         | 7.961                | 8.499                | 8.896                | 8.883                 | 68100         | 12.939                                                        | 23.109               | 25.017               | 26.338               | 26.379                |
| 20100         | 5.245                                                         | 8.737                | 9.339                | 9.751                | 9.750                 | 70100         | 13.152                                                        | 23.561               | 25.517               | 26.871               | 26.933                |
| 22100         | 5.686                                                         | 9.491                | 10.147               | 10.619               | 10.608                | 72100         | 13.367                                                        | 23.999               | 26.005               | 27.400               | 27.457                |
| 24100         | 6.116                                                         | 10.243               | 10.947               | 11.461               | 11.445                | 74100         | 13.576                                                        | 24.434               | 26.489               | 27.918               | 28.006                |
| 26100         | 6.517                                                         | 10.963               | 11.733               | 12.273               | 12.270                | 76100         | 13.784                                                        | 24.868               | 26.978               | 28.443               | 28.506                |
| 28100         | 6.920                                                         | 11.678               | 12.495               | 13.087               | 13.087                | 78100         | 13.975                                                        | 25.293               | 27.445               | 28.939               | 29.015                |
| 30100         | 7.316                                                         | 12.379               | 13.254               | 13.883               | 13.873                | 80100         | 14.165                                                        | 25.705               | 27.904               | 29.424               | 29.520                |
| 32100         | 7.695                                                         | 13.061               | 13.991               | 14.650               | 14.647                | 82100         | 14.366                                                        | 26.107               | 28.368               | 29.930               | 29.994                |
| 34100         | 8.065                                                         | 13.735               | 14.711               | 15.413               | 15.415                | 84100         | 14.557                                                        | 26.513               | 28.822               | 30.415               | 30.492                |
| 36100         | 8.429                                                         | 14.386               | 15.428               | 16.172               | 16.169                | 86100         | 14.738                                                        | 26.899               | 29.261               | 30.879               | 30.971                |
| 38100         | 8.777                                                         | 15.025               | 16.124               | 16.892               | 16.907                | 88100         | 14.910                                                        | 27.287               | 29.705               | 31.351               | 31.432                |
| 40100         | 9.113                                                         | 15.646               | 16.803               | 17.617               | 17.623                | 90100         | 15.096                                                        | 27.672               | 30.133               | 31.809               | 31.904                |
| 42100         | 9.443                                                         | 16.254               | 17.470               | 18.313               | 18.338                | 92100         | 15.265                                                        | 28.052               | 30.566               | 32.276               | 32.360                |
| 44100         | 9.747                                                         | 16.842               | 18.109               | 19.010               | 18.999                | 94100         | 15.432                                                        | 28.415               | 30.971               | 32.734               | 32.824                |
| 46100         | 10.064                                                        | 17.438               | 18.764               | 19.694               | 19.690                | 96100         | 15.599                                                        | 28.782               | 31.389               | 33.183               | 33.273                |
| 48100         | 10.373                                                        | 18.012               | 19.386               | 20.352               | 20.370                | 98100         | 15.751                                                        | 29.126               | 31.784               | 33.609               | 33.715                |

**Table ESI-6.** Phase-shift measurements for different oxygen concentrations of PtTFPP immobilized into AP200/19 in triplicate at 21°C. Modulation frequency of 40100 Hz.

| $pO_2(\%)$ | Replica #1               |                       | Replica #2               |                       | Replica #3               |                       | Average results          |                       | $\Phi_0/\Phi_x^e$ | Phase difference ( $\Phi_{0\% pO_2} - \Phi_{x\%}$ ) |                             |                             |                          |                       |
|------------|--------------------------|-----------------------|--------------------------|-----------------------|--------------------------|-----------------------|--------------------------|-----------------------|-------------------|-----------------------------------------------------|-----------------------------|-----------------------------|--------------------------|-----------------------|
|            | mean<br>(°) <sup>a</sup> | s<br>(°) <sup>b</sup> | mean<br>(°) <sup>a</sup> | s<br>(°) <sup>b</sup> | mean<br>(°) <sup>a</sup> | s<br>(°) <sup>b</sup> | mean<br>(°) <sup>c</sup> | s<br>(°) <sup>d</sup> |                   | Rep. #1<br>(°) <sup>f</sup>                         | Rep. #2<br>(°) <sup>f</sup> | Rep. #3<br>(°) <sup>f</sup> | mean<br>(°) <sup>g</sup> | s<br>(°) <sup>h</sup> |
| 0.00       | 87.743                   | 0.047                 | 87.593                   | 0.049                 | 87.645                   | 0.050                 | 87.660                   | 0.076                 | 1.000             | 0.000                                               | 0.000                       | 0.000                       | 0.000                    | 0.000                 |
| 0.25       | 74.635                   | 0.168                 | 74.492                   | 0.095                 | 74.258                   | 0.059                 | 74.462                   | 0.190                 | 1.176             | 13.108                                              | 12.901                      | 13.387                      | 13.132                   | 0.243                 |
| 0.50       | 66.347                   | 0.535                 | 66.150                   | 0.033                 | 66.548                   | 0.037                 | 66.348                   | 0.198                 | 1.320             | 21.396                                              | 21.243                      | 21.097                      | 21.245                   | 0.149                 |
| 0.75       | 60.076                   | 0.074                 | 60.475                   | 0.047                 | 60.091                   | 0.035                 | 60.214                   | 0.226                 | 1.454             | 27.667                                              | 26.918                      | 27.553                      | 27.380                   | 0.403                 |
| 1          | 57.113                   | 0.034                 | 57.458                   | 0.031                 | 57.512                   | 0.033                 | 57.361                   | 0.216                 | 1.527             | 30.630                                              | 29.935                      | 30.132                      | 30.232                   | 0.358                 |
| 2          | 47.420                   | 0.034                 | 47.698                   | 0.036                 | 47.769                   | 0.030                 | 47.629                   | 0.184                 | 1.839             | 40.323                                              | 39.695                      | 39.875                      | 39.964                   | 0.323                 |
| 3          | 43.430                   | 0.034                 | 43.610                   | 0.031                 | 43.832                   | 0.034                 | 43.624                   | 0.201                 | 2.007             | 44.312                                              | 43.783                      | 43.812                      | 43.969                   | 0.297                 |
| 4          | 41.044                   | 0.045                 | 41.272                   | 0.044                 | 41.516                   | 0.044                 | 41.277                   | 0.235                 | 2.122             | 46.699                                              | 46.121                      | 46.129                      | 46.316                   | 0.331                 |
| 5          | 39.115                   | 0.047                 | 39.080                   | 0.043                 | 39.521                   | 0.040                 | 39.238                   | 0.245                 | 2.232             | 48.628                                              | 48.313                      | 48.123                      | 48.355                   | 0.254                 |
| 6          | 37.811                   | 0.043                 | 37.587                   | 0.046                 | 38.053                   | 0.030                 | 37.817                   | 0.232                 | 2.316             | 49.932                                              | 49.806                      | 49.592                      | 49.776                   | 0.172                 |
| 7          | 36.770                   | 0.041                 | 36.515                   | 0.058                 | 37.016                   | 0.038                 | 36.767                   | 0.250                 | 2.382             | 50.973                                              | 50.878                      | 50.628                      | 50.826                   | 0.178                 |
| 8          | 36.334                   | 0.042                 | 36.233                   | 0.044                 | 36.687                   | 0.046                 | 36.418                   | 0.238                 | 2.405             | 51.409                                              | 51.159                      | 50.957                      | 51.175                   | 0.226                 |
| 9          | 35.172                   | 0.038                 | 35.362                   | 0.048                 | 35.701                   | 0.045                 | 35.412                   | 0.268                 | 2.473             | 52.571                                              | 52.031                      | 51.943                      | 52.182                   | 0.339                 |
| 10         | 34.602                   | 0.037                 | 34.447                   | 0.046                 | 34.108                   | 0.053                 | 34.386                   | 0.252                 | 2.547             | 53.141                                              | 52.946                      | 53.536                      | 53.207                   | 0.300                 |
| 15         | 32.271                   | 0.062                 | 32.270                   | 0.046                 | 32.732                   | 0.053                 | 32.424                   | 0.266                 | 2.701             | 55.472                                              | 55.123                      | 54.913                      | 55.169                   | 0.282                 |
| 20         | 30.711                   | 0.057                 | 30.977                   | 0.054                 | 31.264                   | 0.053                 | 30.984                   | 0.276                 | 2.827             | 57.031                                              | 56.416                      | 56.381                      | 56.609                   | 0.366                 |
| 30         | 28.973                   | 0.065                 | 29.353                   | 0.065                 | 29.518                   | 0.076                 | 29.281                   | 0.279                 | 2.991             | 58.770                                              | 58.040                      | 58.126                      | 58.312                   | 0.398                 |
| 50         | 27.339                   | 0.053                 | 27.552                   | 0.074                 | 27.854                   | 0.076                 | 27.581                   | 0.258                 | 3.175             | 60.404                                              | 59.841                      | 59.790                      | 60.012                   | 0.340                 |
| 100        | 26.039                   | 0.073                 | 26.517                   | 0.069                 | 26.143                   | 0.069                 | 26.233                   | 0.251                 | 3.339             | 61.704                                              | 60.876                      | 61.501                      | 61.361                   | 0.431                 |

<sup>a</sup> Average value (mean) of 100 phase-shift measurements (in degrees) calculated as:  $\bar{\phi} = \frac{1}{n} \sum_{i=1}^n \phi_i$ ; <sup>b</sup> Standard deviation value (s) of 100 phase-shift measurements (in degrees) calculated as:  $s = \left( \frac{1}{n-1} \sum_{i=1}^n (\phi_i - \bar{\phi})^2 \right)^{1/2}$ ; <sup>c</sup> Mean of the average phase-shift values ( $\bar{\phi}$ , in degrees) obtained for each replica, calculated as:  $\bar{\phi}_{avg} = \frac{1}{3} \sum_{i=1}^3 \bar{\phi}_i$ ; <sup>d</sup> Standard deviation value (s) of the average phase-shift values ( $\bar{\phi}_i$ , in degrees) obtained for each replica, calculated as:  $s = \left( \frac{1}{3-1} \sum_{i=1}^3 (\bar{\phi}_i - \bar{\phi}_{avg})^2 \right)^{1/2}$ ; <sup>e</sup> Ratio between the average phase-shift value,  $\bar{\phi}_{avg}$ , at 0% oxygen and any oxygen concentration (i.e.,  $\bar{\phi}_{avg}(0\% pO_2) / \bar{\phi}_{avg}(x\% pO_2)$ ); <sup>f</sup> Average phase difference (in degrees) between the average phase-shift value,  $\bar{\phi}_i$ , at 0% oxygen and any oxygen concentration (i.e.,  $\bar{\phi}_i(0\% pO_2) - \bar{\phi}_i(x\% pO_2)$ ); <sup>g</sup> Average value (mean) of the 3 average phase difference values obtained for each replica (in degrees); <sup>h</sup> Standard deviation value (s) of the 3 average phase difference values obtained for each replica (in degrees).

**Table ESI-7.** Luminescence lifetime measurements for different oxygen concentrations of PtTFPP immobilized into AP200/19 in triplicate at 21° C. Modulation frequency of 40100 Hz.

| $pO_2$ (%) | Replica #1                    |                            | Replica #2                    |                            | Replica #3                    |                            | Average results               |                            | $\tau_0/\tau_x^e$ | Luminescence lifetime difference ( $\tau_{x\% pO_2} - \tau_{0\% pO_2}$ ) |                                  |                                  |                               |                            |
|------------|-------------------------------|----------------------------|-------------------------------|----------------------------|-------------------------------|----------------------------|-------------------------------|----------------------------|-------------------|--------------------------------------------------------------------------|----------------------------------|----------------------------------|-------------------------------|----------------------------|
|            | mean ( $\mu s$ ) <sup>a</sup> | s ( $\mu s$ ) <sup>b</sup> | mean ( $\mu s$ ) <sup>a</sup> | s ( $\mu s$ ) <sup>b</sup> | mean ( $\mu s$ ) <sup>a</sup> | s ( $\mu s$ ) <sup>b</sup> | mean ( $\mu s$ ) <sup>c</sup> | s ( $\mu s$ ) <sup>d</sup> |                   | Rep. #1 ( $\mu s$ ) <sup>f</sup>                                         | Rep. #2 ( $\mu s$ ) <sup>f</sup> | Rep. #3 ( $\mu s$ ) <sup>f</sup> | mean ( $\mu s$ ) <sup>g</sup> | s ( $\mu s$ ) <sup>h</sup> |
| 0          | 100.779                       | 2.132                      | 94.493                        | 1.965                      | 96.493                        | 2.009                      | 97.255                        | 3.211                      | 1.000             | 0.000                                                                    | 0.000                            | 0.000                            | 0.000                         | 0.000                      |
| 0.25       | 14.446                        | 0.166                      | 14.304                        | 0.092                      | 14.080                        | 0.055                      | 14.277                        | 0.184                      | 6.812             | 86.333                                                                   | 80.189                           | 82.412                           | 82.978                        | 3.111                      |
| 0.5        | 9.066                         | 0.231                      | 8.978                         | 0.014                      | 9.148                         | 0.016                      | 9.064                         | 0.085                      | 10.729            | 91.713                                                                   | 85.515                           | 87.344                           | 88.191                        | 3.184                      |
| 0.75       | 6.895                         | 0.020                      | 7.008                         | 0.013                      | 6.899                         | 0.010                      | 6.934                         | 0.063                      | 14.024            | 93.884                                                                   | 87.485                           | 89.593                           | 90.321                        | 3.260                      |
| 1          | 6.138                         | 0.008                      | 6.220                         | 0.007                      | 6.233                         | 0.008                      | 6.197                         | 0.051                      | 15.693            | 94.641                                                                   | 88.273                           | 90.260                           | 91.058                        | 3.258                      |
| 2          | 4.319                         | 0.005                      | 4.361                         | 0.005                      | 4.372                         | 0.004                      | 4.351                         | 0.028                      | 22.351            | 96.460                                                                   | 90.132                           | 92.120                           | 92.904                        | 3.236                      |
| 3          | 3.757                         | 0.004                      | 3.780                         | 0.004                      | 3.810                         | 0.004                      | 3.782                         | 0.026                      | 25.709            | 97.022                                                                   | 90.713                           | 92.682                           | 93.472                        | 3.228                      |
| 4          | 3.455                         | 0.005                      | 3.483                         | 0.005                      | 3.513                         | 0.005                      | 3.484                         | 0.028                      | 27.913            | 97.324                                                                   | 91.010                           | 92.979                           | 93.771                        | 3.230                      |
| 5          | 3.227                         | 0.005                      | 3.223                         | 0.005                      | 3.274                         | 0.004                      | 3.241                         | 0.028                      | 30.002            | 97.552                                                                   | 91.270                           | 93.218                           | 94.014                        | 3.215                      |
| 6          | 3.079                         | 0.004                      | 3.055                         | 0.005                      | 3.106                         | 0.003                      | 3.080                         | 0.025                      | 31.570            | 97.699                                                                   | 91.438                           | 93.386                           | 94.175                        | 3.204                      |
| 7          | 2.965                         | 0.004                      | 2.938                         | 0.006                      | 2.992                         | 0.004                      | 2.965                         | 0.027                      | 32.793            | 97.813                                                                   | 91.555                           | 93.500                           | 94.289                        | 3.203                      |
| 8          | 2.919                         | 0.004                      | 2.908                         | 0.004                      | 2.957                         | 0.005                      | 2.928                         | 0.025                      | 33.213            | 97.860                                                                   | 91.585                           | 93.536                           | 94.327                        | 3.211                      |
| 9          | 2.796                         | 0.003                      | 2.816                         | 0.005                      | 2.852                         | 0.004                      | 2.821                         | 0.028                      | 34.464            | 97.982                                                                   | 91.677                           | 93.641                           | 94.433                        | 3.226                      |
| 10         | 2.738                         | 0.003                      | 2.722                         | 0.004                      | 2.688                         | 0.005                      | 2.716                         | 0.025                      | 35.804            | 98.041                                                                   | 91.771                           | 93.805                           | 94.539                        | 3.198                      |
| 15         | 2.506                         | 0.006                      | 2.506                         | 0.004                      | 2.551                         | 0.005                      | 2.521                         | 0.025                      | 38.575            | 98.273                                                                   | 91.987                           | 93.942                           | 94.734                        | 3.216                      |
| 20         | 2.357                         | 0.005                      | 2.382                         | 0.005                      | 2.409                         | 0.005                      | 2.383                         | 0.026                      | 40.805            | 98.422                                                                   | 92.111                           | 94.083                           | 94.872                        | 3.228                      |
| 30         | 2.197                         | 0.006                      | 2.232                         | 0.006                      | 2.247                         | 0.007                      | 2.225                         | 0.025                      | 43.697            | 98.582                                                                   | 92.261                           | 94.245                           | 95.029                        | 3.232                      |
| 50         | 2.052                         | 0.004                      | 2.070                         | 0.006                      | 2.097                         | 0.006                      | 2.073                         | 0.022                      | 46.907            | 98.727                                                                   | 92.423                           | 94.395                           | 95.182                        | 3.225                      |
| 100        | 1.939                         | 0.006                      | 1.980                         | 0.006                      | 1.948                         | 0.006                      | 1.955                         | 0.021                      | 49.725            | 98.840                                                                   | 92.513                           | 94.545                           | 95.299                        | 3.230                      |

<sup>a</sup> Average value (mean) of 100 luminescence lifetime measurements (in microseconds) calculated as:  $\bar{\tau} = \frac{1}{n} \sum_{i=1}^n \tau_i$ ; <sup>b</sup> Standard deviation value (s) of 100 luminescence lifetime measurements (in microseconds) calculated as:  $s = \left( \frac{1}{n-1} \sum_{i=1}^n (\tau_i - \bar{\tau})^2 \right)^{1/2}$ ; <sup>c</sup> Mean of the average luminescence-lifetime values ( $\bar{\tau}$ , in microseconds) obtained for each replica, calculated as:  $\bar{\mu}_{avg} = \frac{1}{3} \sum_{i=1}^3 \bar{\tau}_i$ ; <sup>d</sup> Standard deviation value (s) of the average luminescence-lifetime values ( $\bar{\tau}_i$ , in microseconds) obtained for each replica, calculated as:  $s = \left( \frac{1}{3-1} \sum_{i=1}^3 (\bar{\tau}_i - \bar{\mu}_{avg})^2 \right)^{1/2}$ ; <sup>e</sup> Ratio between the average luminescence-lifetime value,  $\bar{\tau}_{avg}$ , at 0% oxygen and any oxygen concentration (i.e.,  $\bar{\tau}_{avg}(0\% pO_2) / \bar{\tau}_{avg}(x\% pO_2)$ ); <sup>f</sup> Average lifetime difference (in microseconds) between the average luminescence-lifetime value,  $\bar{\tau}_i$ , at 0% oxygen and any oxygen concentration (i.e.,  $\bar{\tau}_i(0\% pO_2) - \bar{\tau}_i(x\% pO_2)$ ); <sup>g</sup> Average value (mean) of the 3 average lifetime difference values obtained for each replica (in microseconds); <sup>h</sup> Standard deviation value (s) of the 3 average lifetime difference values obtained for each replica (in microseconds).

**Table ESI-8.** Phase-shift measurements for different oxygen concentrations of N969 immobilized into AP200/19 in triplicate at 21° C. Modulation frequency of 94100 Hz.

| $pO_2$ (%) | Replica #1               |                       | Replica #2               |                       | Replica #3               |                       | Average results          |                       | $\Phi_0/\Phi_x^e$ | Phase difference ( $\Phi_{0\% pO_2} - \Phi_{x\%}$ ) |                             |                             |                          |                       |
|------------|--------------------------|-----------------------|--------------------------|-----------------------|--------------------------|-----------------------|--------------------------|-----------------------|-------------------|-----------------------------------------------------|-----------------------------|-----------------------------|--------------------------|-----------------------|
|            | mean<br>(°) <sup>a</sup> | s<br>(°) <sup>b</sup> | mean<br>(°) <sup>a</sup> | s<br>(°) <sup>b</sup> | mean<br>(°) <sup>a</sup> | s<br>(°) <sup>b</sup> | mean<br>(°) <sup>c</sup> | s<br>(°) <sup>d</sup> |                   | Rep. #1<br>(°) <sup>f</sup>                         | Rep. #2<br>(°) <sup>f</sup> | Rep. #3<br>(°) <sup>f</sup> | mean<br>(°) <sup>g</sup> | s<br>(°) <sup>h</sup> |
| 0          | 65.642                   | 0.018                 | 65.608                   | 0.020                 | 65.829                   | 0.018                 | 65.693                   | 0.119                 | 1.000             | 0.000                                               | 0.000                       | 0.000                       | 0.000                    | 0.000                 |
| 0.25       | 53.126                   | 0.029                 | 52.820                   | 0.023                 | 53.179                   | 0.060                 | 53.041                   | 0.193                 | 1.238             | 12.516                                              | 12.787                      | 12.650                      | 12.651                   | 0.135                 |
| 0.5        | 49.111                   | 0.006                 | 48.706                   | 0.004                 | 48.894                   | 0.006                 | 48.903                   | 0.202                 | 1.343             | 16.531                                              | 16.902                      | 16.935                      | 16.789                   | 0.224                 |
| 0.75       | 46.608                   | 0.004                 | 46.249                   | 0.006                 | 46.427                   | 0.005                 | 46.428                   | 0.179                 | 1.414             | 19.033                                              | 19.359                      | 19.402                      | 19.265                   | 0.201                 |
| 1          | 44.801                   | 0.008                 | 44.489                   | 0.004                 | 44.691                   | 0.006                 | 44.660                   | 0.158                 | 1.470             | 20.841                                              | 21.119                      | 21.137                      | 21.032                   | 0.166                 |
| 2          | 40.355                   | 0.007                 | 40.402                   | 0.006                 | 40.698                   | 0.006                 | 40.485                   | 0.186                 | 1.622             | 25.287                                              | 25.205                      | 25.130                      | 25.207                   | 0.078                 |
| 3          | 38.167                   | 0.005                 | 38.140                   | 0.005                 | 38.510                   | 0.005                 | 38.273                   | 0.206                 | 1.716             | 27.475                                              | 27.467                      | 27.319                      | 27.420                   | 0.087                 |
| 4          | 36.555                   | 0.006                 | 36.633                   | 0.006                 | 36.940                   | 0.006                 | 36.709                   | 0.203                 | 1.789             | 29.087                                              | 28.974                      | 28.889                      | 28.983                   | 0.099                 |
| 5          | 35.565                   | 0.005                 | 35.527                   | 0.008                 | 35.954                   | 0.006                 | 35.682                   | 0.236                 | 1.841             | 30.077                                              | 30.081                      | 29.875                      | 30.011                   | 0.117                 |
| 6          | 34.932                   | 0.005                 | 34.666                   | 0.006                 | 35.096                   | 0.007                 | 34.898                   | 0.217                 | 1.882             | 30.710                                              | 30.941                      | 30.733                      | 30.795                   | 0.127                 |
| 7          | 34.260                   | 0.007                 | 33.955                   | 0.008                 | 34.377                   | 0.008                 | 34.197                   | 0.218                 | 1.921             | 31.382                                              | 31.653                      | 31.451                      | 31.495                   | 0.140                 |
| 8          | 33.602                   | 0.007                 | 33.355                   | 0.006                 | 33.762                   | 0.007                 | 33.573                   | 0.205                 | 1.956             | 32.040                                              | 32.253                      | 32.066                      | 32.120                   | 0.115                 |
| 9          | 33.011                   | 0.007                 | 32.820                   | 0.007                 | 33.203                   | 0.006                 | 33.011                   | 0.191                 | 1.990             | 32.631                                              | 32.788                      | 32.626                      | 32.682                   | 0.092                 |
| 10         | 32.703                   | 0.008                 | 32.552                   | 0.008                 | 32.918                   | 0.004                 | 32.724                   | 0.183                 | 2.007             | 32.939                                              | 33.055                      | 32.911                      | 32.968                   | 0.076                 |
| 15         | 30.762                   | 0.008                 | 30.792                   | 0.008                 | 31.020                   | 0.007                 | 30.858                   | 0.141                 | 2.128             | 34.880                                              | 34.815                      | 34.809                      | 34.835                   | 0.039                 |
| 20         | 29.470                   | 0.007                 | 29.651                   | 0.007                 | 29.729                   | 0.008                 | 29.616                   | 0.132                 | 2.218             | 36.172                                              | 35.957                      | 36.100                      | 36.076                   | 0.109                 |
| 30         | 27.775                   | 0.006                 | 28.145                   | 0.009                 | 28.030                   | 0.007                 | 27.983                   | 0.189                 | 2.347             | 37.867                                              | 37.462                      | 37.799                      | 37.709                   | 0.217                 |
| 50         | 26.755                   | 0.008                 | 27.162                   | 0.009                 | 27.027                   | 0.007                 | 26.981                   | 0.207                 | 2.434             | 38.886                                              | 38.445                      | 38.802                      | 38.711                   | 0.234                 |
| 100        | 26.637                   | 0.008                 | 27.073                   | 0.010                 | 26.912                   | 0.008                 | 26.874                   | 0.220                 | 2.444             | 39.005                                              | 38.534                      | 38.917                      | 38.819                   | 0.250                 |

<sup>a</sup> Average value (mean) of 100 phase-shift measurements (in degrees) calculated as:  $\bar{\phi} = \frac{1}{n} \sum_{i=1}^n \phi_i$ ; <sup>b</sup> Standard deviation value (s) of 100 phase-shift measurements (in degrees) calculated as:  $s = \left( \frac{1}{n-1} \sum_{i=1}^n (\phi_i - \bar{\phi})^2 \right)^{1/2}$ ; <sup>c</sup> Mean of the average phase-shift values ( $\bar{\phi}$ , in degrees) obtained for each replica, calculated as:  $\bar{\phi}_{avg} = \frac{1}{3} \sum_{i=1}^3 \bar{\phi}_i$ ; <sup>d</sup> Standard deviation value (s) of the average phase-shift values ( $\bar{\phi}_i$ , in degrees) obtained for each replica, calculated as:  $s = \left( \frac{1}{3-1} \sum_{i=1}^3 (\bar{\phi}_i - \bar{\phi}_{avg})^2 \right)^{1/2}$ ; <sup>e</sup> Ratio between the average phase-shift value,  $\bar{\phi}_{avg}$ , at 0% oxygen and any oxygen concentration (i.e.,  $\bar{\phi}_{avg}(0\% pO_2) / \bar{\phi}_{avg}(x\% pO_2)$ ); <sup>f</sup> Average phase difference (in degrees) between the average phase-shift value,  $\bar{\phi}_i$ , at 0% oxygen and any oxygen concentration (i.e.,  $\bar{\phi}_i(0\% pO_2) - \bar{\phi}_i(x\% pO_2)$ ); <sup>g</sup> Average value (mean) of the 3 average phase difference values obtained for each replica (in degrees); <sup>h</sup> Standard deviation value (s) of the 3 average phase difference values obtained for each replica (in degrees).

**Table ESI-9.** Luminescence lifetime measurements for different oxygen concentrations of N969 immobilized into AP200/19 in triplicate at 21° C. Modulation frequency of 94100 Hz.

| $pO_2$ (%) | Replica #1                    |                            | Replica #2                    |                            | Replica #3                    |                            | Average results               |                            | $\tau_0/\tau_x^e$ | Luminescence lifetime difference ( $\tau_{x\% pO_2} - \tau_{0\% pO_2}$ ) |                                  |                                  |                               |                            |
|------------|-------------------------------|----------------------------|-------------------------------|----------------------------|-------------------------------|----------------------------|-------------------------------|----------------------------|-------------------|--------------------------------------------------------------------------|----------------------------------|----------------------------------|-------------------------------|----------------------------|
|            | mean ( $\mu s$ ) <sup>a</sup> | s ( $\mu s$ ) <sup>b</sup> | mean ( $\mu s$ ) <sup>a</sup> | s ( $\mu s$ ) <sup>b</sup> | mean ( $\mu s$ ) <sup>a</sup> | s ( $\mu s$ ) <sup>b</sup> | mean ( $\mu s$ ) <sup>c</sup> | s ( $\mu s$ ) <sup>d</sup> |                   | Rep. #1 ( $\mu s$ ) <sup>f</sup>                                         | Rep. #2 ( $\mu s$ ) <sup>f</sup> | Rep. #3 ( $\mu s$ ) <sup>f</sup> | mean ( $\mu s$ ) <sup>g</sup> | s ( $\mu s$ ) <sup>h</sup> |
| 0          | 3.735                         | 0.003                      | 3.730                         | 0.003                      | 3.768                         | 0.003                      | 3.744                         | 0.020                      | 1.000             | 0.000                                                                    | 0.000                            | 0.000                            | 0.000                         | 0.000                      |
| 0.25       | 2.254                         | 0.002                      | 2.229                         | 0.001                      | 2.259                         | 0.004                      | 2.247                         | 0.015                      | 1.665             | 1.481                                                                    | 1.500                            | 1.509                            | 1.496                         | 0.014                      |
| 0.5        | 1.953                         | 0.001                      | 1.925                         | 0.001                      | 1.938                         | 0.001                      | 1.939                         | 0.013                      | 1.931             | 1.782                                                                    | 1.804                            | 1.830                            | 1.805                         | 0.023                      |
| 0.75       | 1.789                         | 0.001                      | 1.766                         | 0.001                      | 1.777                         | 0.001                      | 1.777                         | 0.011                      | 2.106             | 1.946                                                                    | 1.963                            | 1.990                            | 1.967                         | 0.022                      |
| 1          | 1.679                         | 0.001                      | 1.661                         | 0.001                      | 1.673                         | 0.001                      | 1.671                         | 0.009                      | 2.240             | 2.056                                                                    | 2.068                            | 2.095                            | 2.073                         | 0.020                      |
| 2          | 1.437                         | 0.001                      | 1.439                         | 0.001                      | 1.454                         | 0.001                      | 1.443                         | 0.009                      | 2.593             | 2.298                                                                    | 2.290                            | 2.313                            | 2.301                         | 0.011                      |
| 3          | 1.329                         | 0.001                      | 1.328                         | 0.001                      | 1.345                         | 0.001                      | 1.334                         | 0.009                      | 2.806             | 2.406                                                                    | 2.401                            | 2.422                            | 2.410                         | 0.011                      |
| 4          | 1.254                         | 0.001                      | 1.257                         | 0.001                      | 1.271                         | 0.001                      | 1.261                         | 0.009                      | 2.969             | 2.481                                                                    | 2.472                            | 2.496                            | 2.483                         | 0.012                      |
| 5          | 1.209                         | 0.001                      | 1.207                         | 0.001                      | 1.226                         | 0.001                      | 1.214                         | 0.010                      | 3.083             | 2.526                                                                    | 2.522                            | 2.541                            | 2.530                         | 0.010                      |
| 6          | 1.181                         | 0.001                      | 1.169                         | 0.001                      | 1.188                         | 0.001                      | 1.179                         | 0.009                      | 3.174             | 2.554                                                                    | 2.560                            | 2.580                            | 2.565                         | 0.013                      |
| 7          | 1.152                         | 0.001                      | 1.138                         | 0.001                      | 1.157                         | 0.001                      | 1.149                         | 0.009                      | 3.258             | 2.583                                                                    | 2.591                            | 2.611                            | 2.595                         | 0.014                      |
| 8          | 1.123                         | 0.001                      | 1.113                         | 0.001                      | 1.130                         | 0.001                      | 1.122                         | 0.008                      | 3.335             | 2.612                                                                    | 2.616                            | 2.637                            | 2.622                         | 0.013                      |
| 9          | 1.098                         | 0.001                      | 1.090                         | 0.001                      | 1.106                         | 0.001                      | 1.098                         | 0.008                      | 3.407             | 2.637                                                                    | 2.639                            | 2.661                            | 2.646                         | 0.013                      |
| 10         | 1.086                         | 0.001                      | 1.079                         | 0.001                      | 1.094                         | 0.001                      | 1.086                         | 0.007                      | 3.445             | 2.650                                                                    | 2.650                            | 2.673                            | 2.658                         | 0.013                      |
| 15         | 1.006                         | 0.001                      | 1.007                         | 0.001                      | 1.017                         | 0.001                      | 1.010                         | 0.005                      | 3.705             | 2.729                                                                    | 2.722                            | 2.751                            | 2.734                         | 0.015                      |
| 20         | 0.955                         | 0.001                      | 0.962                         | 0.001                      | 0.965                         | 0.001                      | 0.961                         | 0.005                      | 3.894             | 2.780                                                                    | 2.767                            | 2.802                            | 2.783                         | 0.018                      |
| 30         | 0.890                         | 0.001                      | 0.904                         | 0.001                      | 0.900                         | 0.001                      | 0.898                         | 0.007                      | 4.167             | 2.845                                                                    | 2.825                            | 2.868                            | 2.846                         | 0.021                      |
| 50         | 0.852                         | 0.001                      | 0.867                         | 0.001                      | 0.862                         | 0.001                      | 0.861                         | 0.007                      | 4.348             | 2.883                                                                    | 2.862                            | 2.905                            | 2.883                         | 0.021                      |
| 100        | 0.848                         | 0.001                      | 0.864                         | 0.001                      | 0.858                         | 0.001                      | 0.857                         | 0.008                      | 4.369             | 2.887                                                                    | 2.865                            | 2.910                            | 2.887                         | 0.022                      |

<sup>a</sup> Average value (mean) of 100 luminescence lifetime measurements (in microseconds) calculated as:  $\bar{\tau} = \frac{1}{n} \sum_{i=1}^n \tau_i$ ; <sup>b</sup> Standard deviation value (s) of 100 luminescence lifetime measurements (in microseconds) calculated as:  $s = \left( \frac{1}{n-1} \sum_{i=1}^n (\tau_i - \bar{\tau})^2 \right)^{1/2}$ ; <sup>c</sup> Mean of the average luminescence-lifetime values ( $\bar{\tau}$ , in microseconds) obtained for each replica, calculated as:  $\bar{\mu}_{avg} = \frac{1}{3} \sum_{i=1}^3 \bar{\tau}_i$ ; <sup>d</sup> Standard deviation value (s) of the average luminescence-lifetime values ( $\bar{\tau}_i$ , in microseconds) obtained for each replica, calculated as:  $s = \left( \frac{1}{3-1} \sum_{i=1}^3 (\bar{\tau}_i - \bar{\mu}_{avg})^2 \right)^{1/2}$ ; <sup>e</sup> Ratio between the average luminescence-lifetime value,  $\bar{\tau}_{avg}$ , at 0% oxygen and any oxygen concentration (i.e.,  $\bar{\tau}_{avg}(0\% pO_2) / \bar{\tau}_{avg}(x\% pO_2)$ ); <sup>f</sup> Average lifetime difference (in microseconds) between the average luminescence-lifetime value,  $\bar{\tau}_i$ , at 0% oxygen and any oxygen concentration (i.e.,  $\bar{\tau}_i(0\% pO_2) - \bar{\tau}_i(x\% pO_2)$ ); <sup>g</sup> Average value (mean) of the 3 average lifetime difference values obtained for each replica (in microseconds); <sup>h</sup> Standard deviation value (s) of the 3 average lifetime difference values obtained for each replica (in microseconds).



**Table ESI-10.** Phase-shift measurements for different oxygen concentrations of N1008 immobilized into AP200/19 in triplicate at 21°  
C. Modulation frequency of 30100 Hz.

| $pO_2$ (%) | Replica #1               |                       | Replica #2               |                       | Replica #3               |                       | Average results          |                       | $\Phi_0/\Phi_x^c$ | Phase difference ( $\Phi_{0\% pO_2} - \Phi_{x\%}$ ) |                             |                             |                          |                       |
|------------|--------------------------|-----------------------|--------------------------|-----------------------|--------------------------|-----------------------|--------------------------|-----------------------|-------------------|-----------------------------------------------------|-----------------------------|-----------------------------|--------------------------|-----------------------|
|            | mean<br>(°) <sup>a</sup> | s<br>(°) <sup>b</sup> | mean<br>(°) <sup>a</sup> | s<br>(°) <sup>b</sup> | mean<br>(°) <sup>a</sup> | s<br>(°) <sup>b</sup> | mean<br>(°) <sup>c</sup> | s<br>(°) <sup>d</sup> |                   | Rep. #1<br>(°) <sup>f</sup>                         | Rep. #2<br>(°) <sup>f</sup> | Rep. #3<br>(°) <sup>f</sup> | mean<br>(°) <sup>g</sup> | s<br>(°) <sup>h</sup> |
| 0          | 57.904                   | 0.015                 | 58.028                   | 0.024                 | 57.561                   | 0.014                 | 57.831                   | 0.241                 | 1.000             | 0.000                                               | 0.000                       | 0.000                       | 0.000                    | 0.000                 |
| 0.25       | 52.640                   | 0.047                 | 53.122                   | 0.030                 | 52.861                   | 0.035                 | 52.874                   | 0.241                 | 1.093             | 5.264                                               | 4.906                       | 4.700                       | 4.956                    | 0.285                 |
| 0.5        | 50.015                   | 0.016                 | 50.598                   | 0.043                 | 50.351                   | 0.007                 | 50.321                   | 0.292                 | 1.149             | 7.889                                               | 7.430                       | 7.210                       | 7.509                    | 0.346                 |
| 0.75       | 47.883                   | 0.011                 | 48.331                   | 0.028                 | 48.280                   | 0.008                 | 48.165                   | 0.245                 | 1.200             | 10.021                                              | 9.696                       | 9.281                       | 9.666                    | 0.370                 |
| 1          | 46.326                   | 0.010                 | 46.772                   | 0.016                 | 46.726                   | 0.008                 | 46.608                   | 0.245                 | 1.240             | 11.578                                              | 11.255                      | 10.835                      | 11.223                   | 0.372                 |
| 2          | 42.534                   | 0.006                 | 43.023                   | 0.013                 | 42.804                   | 0.006                 | 42.787                   | 0.245                 | 1.351             | 15.370                                              | 15.004                      | 14.757                      | 15.044                   | 0.308                 |
| 3          | 40.121                   | 0.004                 | 40.616                   | 0.011                 | 40.262                   | 0.003                 | 40.333                   | 0.255                 | 1.433             | 17.783                                              | 17.411                      | 17.299                      | 17.498                   | 0.253                 |
| 4          | 38.199                   | 0.005                 | 38.570                   | 0.012                 | 38.525                   | 0.005                 | 38.431                   | 0.202                 | 1.504             | 19.705                                              | 19.458                      | 19.036                      | 19.400                   | 0.338                 |
| 5          | 36.970                   | 0.005                 | 37.410                   | 0.010                 | 37.002                   | 0.004                 | 37.127                   | 0.245                 | 1.557             | 20.934                                              | 20.618                      | 20.559                      | 20.704                   | 0.201                 |
| 6          | 35.898                   | 0.005                 | 36.304                   | 0.009                 | 35.843                   | 0.005                 | 36.015                   | 0.251                 | 1.605             | 22.006                                              | 21.724                      | 21.718                      | 21.816                   | 0.164                 |
| 7          | 34.992                   | 0.006                 | 35.361                   | 0.008                 | 34.855                   | 0.005                 | 35.069                   | 0.262                 | 1.649             | 22.912                                              | 22.666                      | 22.706                      | 22.762                   | 0.131                 |
| 8          | 34.196                   | 0.005                 | 34.531                   | 0.008                 | 34.081                   | 0.004                 | 34.269                   | 0.233                 | 1.687             | 23.708                                              | 23.496                      | 23.480                      | 23.561                   | 0.127                 |
| 9          | 33.474                   | 0.004                 | 33.875                   | 0.009                 | 33.381                   | 0.005                 | 33.577                   | 0.262                 | 1.722             | 24.430                                              | 24.153                      | 24.180                      | 24.254                   | 0.152                 |
| 10         | 33.124                   | 0.004                 | 33.515                   | 0.008                 | 33.060                   | 0.005                 | 33.233                   | 0.246                 | 1.740             | 24.780                                              | 24.512                      | 24.501                      | 24.598                   | 0.157                 |
| 15         | 30.629                   | 0.004                 | 30.993                   | 0.006                 | 30.559                   | 0.004                 | 30.727                   | 0.233                 | 1.882             | 27.275                                              | 27.035                      | 27.002                      | 27.104                   | 0.148                 |
| 20         | 28.852                   | 0.005                 | 29.204                   | 0.006                 | 28.739                   | 0.004                 | 28.932                   | 0.242                 | 1.998             | 29.051                                              | 28.824                      | 28.822                      | 28.899                   | 0.131                 |
| 30         | 26.332                   | 0.006                 | 26.787                   | 0.007                 | 26.231                   | 0.005                 | 26.450                   | 0.296                 | 2.186             | 31.572                                              | 31.241                      | 31.330                      | 31.381                   | 0.171                 |
| 50         | 24.281                   | 0.007                 | 24.718                   | 0.005                 | 24.208                   | 0.005                 | 24.402                   | 0.275                 | 2.369             | 33.623                                              | 33.310                      | 33.353                      | 33.429                   | 0.169                 |
| 100        | 24.241                   | 0.006                 | 24.734                   | 0.007                 | 24.317                   | 0.006                 | 24.431                   | 0.265                 | 2.367             | 33.663                                              | 33.294                      | 33.244                      | 33.400                   | 0.228                 |

<sup>a</sup> Average value (mean) of 100 phase-shift measurements (in degrees) calculated as:  $\bar{\phi} = \frac{1}{n} \sum_{i=1}^n \phi_i$ ; <sup>b</sup> Standard deviation value (s) of 100 phase-shift measurements (in degrees) calculated as:  $s = \left( \frac{1}{n-1} \sum_{i=1}^n (\phi_i - \bar{\phi})^2 \right)^{1/2}$ ; <sup>c</sup> Mean of the average phase-shift values ( $\bar{\phi}$ , in degrees) obtained for each replica, calculated as:  $\bar{\phi}_{avg} = \frac{1}{3} \sum_{i=1}^3 \bar{\phi}_i$ ; <sup>d</sup> Standard deviation value (s) of the average phase-shift values ( $\bar{\phi}_i$ , in degrees) obtained for each replica, calculated as:  $s = \left( \frac{1}{3-1} \sum_{i=1}^3 (\bar{\phi}_i - \bar{\phi}_{avg})^2 \right)^{1/2}$ ; <sup>e</sup> Ratio between the average phase-shift value,  $\bar{\phi}_{avg}$ , at 0% oxygen and any oxygen concentration (i.e.,  $\bar{\phi}_{avg}(0\% pO_2) / \bar{\phi}_{avg}(x\% pO_2)$ ); <sup>f</sup> Average phase difference (in degrees) between the average phase-shift value,  $\bar{\phi}_i$ , at 0% oxygen and any oxygen concentration (i.e.,  $\bar{\phi}_i(0\% pO_2) - \bar{\phi}_i(x\% pO_2)$ ); <sup>g</sup> Average value (mean) of the 3 average phase difference values obtained for each replica (in degrees); <sup>h</sup> Standard deviation value (s) of the 3 average phase difference values obtained for each replica (in degrees).

**Table ESI-11.** Luminescence lifetime measurements for different oxygen concentrations of N1008 immobilized into AP200/19 in triplicate at 21° C. Modulation frequency of 30100 Hz.

| $pO_2$ (%) | Replica #1                    |                            | Replica #2                    |                            | Replica #3                    |                            | Average results               |                            | $\tau_0/\tau_x^e$ | Luminescence lifetime difference ( $\tau_{x\% pO_2} - \tau_{0\% pO_2}$ ) |                                  |                                  |                               |                            |
|------------|-------------------------------|----------------------------|-------------------------------|----------------------------|-------------------------------|----------------------------|-------------------------------|----------------------------|-------------------|--------------------------------------------------------------------------|----------------------------------|----------------------------------|-------------------------------|----------------------------|
|            | mean ( $\mu s$ ) <sup>a</sup> | s ( $\mu s$ ) <sup>b</sup> | mean ( $\mu s$ ) <sup>a</sup> | s ( $\mu s$ ) <sup>b</sup> | mean ( $\mu s$ ) <sup>a</sup> | s ( $\mu s$ ) <sup>b</sup> | mean ( $\mu s$ ) <sup>c</sup> | s ( $\mu s$ ) <sup>d</sup> |                   | Rep. #1 ( $\mu s$ ) <sup>f</sup>                                         | Rep. #2 ( $\mu s$ ) <sup>f</sup> | Rep. #3 ( $\mu s$ ) <sup>f</sup> | mean ( $\mu s$ ) <sup>g</sup> | s ( $\mu s$ ) <sup>h</sup> |
| 0          | 8.430                         | 0.005                      | 8.471                         | 0.008                      | 8.319                         | 0.004                      | 8.407                         | 0.078                      | 1.000             | 0.000                                                                    | 0.000                            | 0.000                            | 0.000                         | 0.000                      |
| 0.25       | 6.926                         | 0.011                      | 7.048                         | 0.007                      | 6.981                         | 0.009                      | 6.985                         | 0.061                      | 1.203             | 1.504                                                                    | 1.423                            | 1.337                            | 1.421                         | 0.083                      |
| 0.5        | 6.304                         | 0.003                      | 6.436                         | 0.009                      | 6.380                         | 0.001                      | 6.374                         | 0.066                      | 1.319             | 2.125                                                                    | 2.034                            | 1.939                            | 2.033                         | 0.093                      |
| 0.75       | 5.848                         | 0.002                      | 5.941                         | 0.006                      | 5.930                         | 0.001                      | 5.906                         | 0.050                      | 1.423             | 2.582                                                                    | 2.530                            | 2.389                            | 2.500                         | 0.099                      |
| 1          | 5.538                         | 0.002                      | 5.625                         | 0.003                      | 5.616                         | 0.001                      | 5.593                         | 0.047                      | 1.503             | 2.892                                                                    | 2.846                            | 2.703                            | 2.813                         | 0.098                      |
| 2          | 4.851                         | 0.001                      | 4.934                         | 0.002                      | 4.897                         | 0.001                      | 4.894                         | 0.042                      | 1.717             | 3.579                                                                    | 3.536                            | 3.422                            | 3.512                         | 0.081                      |
| 3          | 4.456                         | 0.001                      | 4.534                         | 0.001                      | 4.478                         | 0.001                      | 4.489                         | 0.040                      | 1.872             | 3.974                                                                    | 3.936                            | 3.841                            | 3.917                         | 0.068                      |
| 4          | 4.160                         | 0.001                      | 4.216                         | 0.001                      | 4.209                         | 0.001                      | 4.195                         | 0.030                      | 2.003             | 4.269                                                                    | 4.254                            | 4.109                            | 4.211                         | 0.088                      |
| 5          | 3.980                         | 0.001                      | 4.044                         | 0.001                      | 3.984                         | 0.001                      | 4.003                         | 0.035                      | 2.100             | 4.450                                                                    | 4.427                            | 4.334                            | 4.404                         | 0.061                      |
| 6          | 3.827                         | 0.001                      | 3.884                         | 0.001                      | 3.819                         | 0.001                      | 3.843                         | 0.035                      | 2.187             | 4.603                                                                    | 4.586                            | 4.500                            | 4.563                         | 0.055                      |
| 7          | 3.701                         | 0.001                      | 3.752                         | 0.001                      | 3.682                         | 0.001                      | 3.712                         | 0.036                      | 2.264             | 4.729                                                                    | 4.718                            | 4.637                            | 4.695                         | 0.050                      |
| 8          | 3.592                         | 0.001                      | 3.638                         | 0.001                      | 3.577                         | 0.001                      | 3.602                         | 0.031                      | 2.333             | 4.837                                                                    | 4.832                            | 4.742                            | 4.804                         | 0.053                      |
| 9          | 3.496                         | 0.001                      | 3.549                         | 0.001                      | 3.484                         | 0.001                      | 3.510                         | 0.035                      | 2.395             | 4.934                                                                    | 4.921                            | 4.835                            | 4.897                         | 0.053                      |
| 10         | 3.450                         | 0.001                      | 3.501                         | 0.001                      | 3.441                         | 0.001                      | 3.464                         | 0.032                      | 2.426             | 4.980                                                                    | 4.969                            | 4.877                            | 4.942                         | 0.056                      |
| 15         | 3.130                         | 0.001                      | 3.176                         | 0.001                      | 3.122                         | 0.001                      | 3.143                         | 0.029                      | 2.674             | 5.299                                                                    | 5.295                            | 5.197                            | 5.264                         | 0.057                      |
| 20         | 2.913                         | 0.001                      | 2.955                         | 0.001                      | 2.899                         | 0.001                      | 2.922                         | 0.029                      | 2.876             | 5.517                                                                    | 5.515                            | 5.420                            | 5.484                         | 0.055                      |
| 30         | 2.617                         | 0.001                      | 2.669                         | 0.001                      | 2.605                         | 0.001                      | 2.630                         | 0.034                      | 3.195             | 5.813                                                                    | 5.801                            | 5.714                            | 5.776                         | 0.054                      |
| 50         | 2.385                         | 0.001                      | 2.434                         | 0.001                      | 2.377                         | 0.001                      | 2.398                         | 0.030                      | 3.504             | 6.045                                                                    | 6.037                            | 5.942                            | 6.008                         | 0.057                      |
| 100        | 2.380                         | 0.001                      | 2.435                         | 0.001                      | 2.389                         | 0.001                      | 2.402                         | 0.029                      | 3.500             | 6.049                                                                    | 6.035                            | 5.930                            | 6.005                         | 0.065                      |

<sup>a</sup> Average value (mean) of 100 luminescence lifetime measurements (in microseconds) calculated as:  $\bar{\tau} = \frac{1}{n} \sum_{i=1}^n \tau_i$ ; <sup>b</sup> Standard deviation value (s) of 100 luminescence lifetime measurements (in microseconds) calculated as:  $s = \left( \frac{1}{n-1} \sum_{i=1}^n (\tau_i - \bar{\tau})^2 \right)^{1/2}$ ; <sup>c</sup> Mean of the average luminescence-lifetime values ( $\bar{\tau}$ , in microseconds) obtained for each replica, calculated as:  $\bar{\mu}_{avg} = \frac{1}{3} \sum_{i=1}^3 \bar{\tau}_i$ ; <sup>d</sup> Standard deviation value (s) of the average luminescence-lifetime values ( $\bar{\tau}_i$ , in microseconds) obtained for each replica, calculated as:  $s = \left( \frac{1}{3-1} \sum_{i=1}^3 (\bar{\tau}_i - \bar{\mu}_{avg})^2 \right)^{1/2}$ ; <sup>e</sup> Ratio between the average luminescence-lifetime value,  $\bar{\tau}_{avg}$ , at 0% oxygen and any oxygen concentration (i.e.,  $\bar{\tau}_{avg}(0\% pO_2) / \bar{\tau}_{avg}(x\% pO_2)$ ); <sup>f</sup> Average lifetime difference (in microseconds) between the average luminescence-lifetime value,  $\bar{\tau}_i$ , at 0% oxygen and any oxygen concentration (i.e.,  $\bar{\tau}_i(0\% pO_2) - \bar{\tau}_i(x\% pO_2)$ ); <sup>g</sup> Average value (mean) of the 3 average lifetime difference values obtained for each replica (in microseconds); <sup>h</sup> Standard deviation value (s) of the 3 average lifetime difference values obtained for each replica (in microseconds).

**Table ESI-12.** Phase-shift measurements for different oxygen concentrations of EB146 immobilized into AP200/19 in triplicate at 21° C. Modulation frequency of 94100 Hz.

| $pO_2$ (%) | Replica #1               |                       | Replica #2               |                       | Replica #3               |                       | Average results          |                       | $\Phi_0/\Phi_x^e$ | Phase difference ( $\Phi_{0\% pO_2} - \Phi_{x\%}$ ) |                             |                             |                          |                       |
|------------|--------------------------|-----------------------|--------------------------|-----------------------|--------------------------|-----------------------|--------------------------|-----------------------|-------------------|-----------------------------------------------------|-----------------------------|-----------------------------|--------------------------|-----------------------|
|            | mean<br>(°) <sup>a</sup> | s<br>(°) <sup>b</sup> | mean<br>(°) <sup>a</sup> | s<br>(°) <sup>b</sup> | mean<br>(°) <sup>a</sup> | s<br>(°) <sup>b</sup> | mean<br>(°) <sup>c</sup> | s<br>(°) <sup>d</sup> |                   | Rep. #1<br>(°) <sup>f</sup>                         | Rep. #2<br>(°) <sup>f</sup> | Rep. #3<br>(°) <sup>f</sup> | mean<br>(°) <sup>g</sup> | s<br>(°) <sup>h</sup> |
| 0          | 48.090                   | 0.012                 | 48.004                   | 0.014                 | 48.144                   | 0.013                 | 48.079                   | 0.070                 | 1.000             | 0.000                                               | 0.000                       | 0.000                       | 0.000                    | 0.000                 |
| 0.25       | 40.483                   | 0.033                 | 41.013                   | 0.039                 | 40.616                   | 0.020                 | 40.704                   | 0.275                 | 1.181             | 7.606                                               | 6.991                       | 7.528                       | 7.375                    | 0.335                 |
| 0.5        | 36.641                   | 0.019                 | 37.035                   | 0.016                 | 36.546                   | 0.005                 | 36.741                   | 0.259                 | 1.308             | 11.449                                              | 10.969                      | 11.598                      | 11.338                   | 0.328                 |
| 0.75       | 34.303                   | 0.015                 | 34.769                   | 0.020                 | 34.389                   | 0.007                 | 34.487                   | 0.248                 | 1.394             | 13.786                                              | 13.234                      | 13.755                      | 13.592                   | 0.310                 |
| 1          | 32.621                   | 0.009                 | 32.905                   | 0.012                 | 32.425                   | 0.004                 | 32.651                   | 0.241                 | 1.472             | 15.468                                              | 15.098                      | 15.719                      | 15.428                   | 0.312                 |
| 2          | 27.651                   | 0.008                 | 27.423                   | 0.010                 | 27.094                   | 0.005                 | 27.389                   | 0.280                 | 1.755             | 20.438                                              | 20.580                      | 21.050                      | 20.690                   | 0.320                 |
| 3          | 25.326                   | 0.005                 | 25.844                   | 0.006                 | 25.513                   | 0.006                 | 25.561                   | 0.262                 | 1.880             | 22.764                                              | 22.160                      | 22.631                      | 22.518                   | 0.317                 |
| 4          | 23.493                   | 0.006                 | 24.036                   | 0.006                 | 23.739                   | 0.005                 | 23.756                   | 0.271                 | 2.023             | 24.596                                              | 23.968                      | 24.405                      | 24.323                   | 0.322                 |
| 5          | 22.553                   | 0.008                 | 22.788                   | 0.005                 | 22.372                   | 0.007                 | 22.571                   | 0.208                 | 2.130             | 25.537                                              | 25.216                      | 25.772                      | 25.508                   | 0.279                 |
| 6          | 21.490                   | 0.007                 | 21.818                   | 0.004                 | 21.384                   | 0.006                 | 21.564                   | 0.226                 | 2.229             | 26.599                                              | 26.186                      | 26.760                      | 26.515                   | 0.296                 |
| 7          | 21.108                   | 0.005                 | 21.221                   | 0.006                 | 20.685                   | 0.007                 | 21.005                   | 0.282                 | 2.288             | 26.981                                              | 26.783                      | 27.459                      | 27.074                   | 0.347                 |
| 8          | 20.549                   | 0.007                 | 21.039                   | 0.006                 | 20.500                   | 0.008                 | 20.696                   | 0.298                 | 2.323             | 27.541                                              | 26.964                      | 27.644                      | 27.383                   | 0.366                 |
| 9          | 19.757                   | 0.009                 | 20.038                   | 0.007                 | 19.530                   | 0.006                 | 19.775                   | 0.254                 | 2.431             | 28.333                                              | 27.965                      | 28.614                      | 28.304                   | 0.325                 |
| 10         | 19.620                   | 0.008                 | 19.991                   | 0.005                 | 19.413                   | 0.006                 | 19.675                   | 0.292                 | 2.443             | 28.470                                              | 28.013                      | 28.731                      | 28.404                   | 0.363                 |
| 15         | 17.941                   | 0.008                 | 18.325                   | 0.006                 | 17.789                   | 0.009                 | 18.018                   | 0.276                 | 2.668             | 30.148                                              | 29.678                      | 30.355                      | 30.061                   | 0.347                 |
| 20         | 16.963                   | 0.009                 | 17.441                   | 0.009                 | 16.918                   | 0.006                 | 17.108                   | 0.289                 | 2.810             | 31.126                                              | 30.563                      | 31.226                      | 30.971                   | 0.357                 |
| 30         | 15.719                   | 0.009                 | 16.094                   | 0.009                 | 15.557                   | 0.009                 | 15.790                   | 0.275                 | 3.044             | 32.370                                              | 31.910                      | 32.587                      | 32.289                   | 0.345                 |
| 50         | 15.087                   | 0.007                 | 15.653                   | 0.011                 | 15.301                   | 0.007                 | 15.347                   | 0.286                 | 3.132             | 33.003                                              | 32.350                      | 32.843                      | 32.732                   | 0.340                 |
| 100        | 15.064                   | 0.011                 | 15.601                   | 0.007                 | 15.103                   | 0.009                 | 15.256                   | 0.299                 | 3.151             | 33.025                                              | 32.402                      | 33.041                      | 32.823                   | 0.364                 |

<sup>a</sup> Average value (mean) of 100 phase-shift measurements (in degrees) calculated as:  $\bar{\phi} = \frac{1}{n} \sum_{i=1}^n \phi_i$ ; <sup>b</sup> Standard deviation value (s) of 100 phase-shift measurements (in degrees) calculated as:  $s = \left( \frac{1}{n-1} \sum_{i=1}^n (\phi_i - \bar{\phi})^2 \right)^{1/2}$ ; <sup>c</sup> Mean of the average phase-shift values ( $\bar{\phi}$ , in degrees) obtained for each replica, calculated as:  $\bar{\phi}_{avg} = \frac{1}{3} \sum_{i=1}^3 \bar{\phi}_i$ ; <sup>d</sup> Standard deviation value (s) of the average phase-shift values ( $\bar{\phi}_i$ , in degrees) obtained for each replica, calculated as:  $s = \left( \frac{1}{3-1} \sum_{i=1}^3 (\bar{\phi}_i - \bar{\phi}_{avg})^2 \right)^{1/2}$ ; <sup>e</sup> Ratio between the average phase-shift value,  $\bar{\phi}_{avg}$ , at 0% oxygen and any oxygen concentration (i.e.,  $\bar{\phi}_{avg}(0\% pO_2) / \bar{\phi}_{avg}(x\% pO_2)$ ); <sup>f</sup> Average phase difference (in degrees) between the average phase-shift value,  $\bar{\phi}_i$ , at 0% oxygen and any oxygen concentration (i.e.,  $\bar{\phi}_i(0\% pO_2) - \bar{\phi}_i(x\% pO_2)$ ); <sup>g</sup> Average value (mean) of the 3 average phase difference values obtained for each replica (in degrees); <sup>h</sup> Standard deviation value (s) of the 3 average phase difference values obtained for each replica (in degrees).

**Table ESI-13.** Luminescence lifetime measurements for different oxygen concentrations of EB146 immobilized into AP200/19 in triplicate at 21° C. Modulation frequency of 94100 Hz.

| $pO_2$ (%) | Replica #1                    |                            | Replica #2                    |                            | Replica #3                    |                            | Average results               |                            | $\tau_0/\tau_x^e$ | Luminescence lifetime difference ( $\tau_{x\% pO_2} - \tau_{0\% pO_2}$ ) |                                  |                                  |                               |                            |
|------------|-------------------------------|----------------------------|-------------------------------|----------------------------|-------------------------------|----------------------------|-------------------------------|----------------------------|-------------------|--------------------------------------------------------------------------|----------------------------------|----------------------------------|-------------------------------|----------------------------|
|            | mean ( $\mu s$ ) <sup>a</sup> | s ( $\mu s$ ) <sup>b</sup> | mean ( $\mu s$ ) <sup>a</sup> | s ( $\mu s$ ) <sup>b</sup> | mean ( $\mu s$ ) <sup>a</sup> | s ( $\mu s$ ) <sup>b</sup> | mean ( $\mu s$ ) <sup>c</sup> | s ( $\mu s$ ) <sup>d</sup> |                   | Rep. #1 ( $\mu s$ ) <sup>f</sup>                                         | Rep. #2 ( $\mu s$ ) <sup>f</sup> | Rep. #3 ( $\mu s$ ) <sup>f</sup> | mean ( $\mu s$ ) <sup>g</sup> | s ( $\mu s$ ) <sup>h</sup> |
| 0          | 1.884                         | 0.001                      | 1.878                         | 0.001                      | 1.888                         | 0.001                      | 1.883                         | 0.004                      | 1.000             | 0.000                                                                    | 0.000                            | 0.000                            | 0.000                         | 0.000                      |
| 0.25       | 1.443                         | 0.001                      | 1.471                         | 0.002                      | 1.450                         | 0.001                      | 1.455                         | 0.014                      | 1.294             | 0.440                                                                    | 0.407                            | 0.437                            | 0.428                         | 0.018                      |
| 0.5        | 1.258                         | 0.001                      | 1.276                         | 0.001                      | 1.253                         | 0.001                      | 1.262                         | 0.011                      | 1.491             | 0.626                                                                    | 0.602                            | 0.634                            | 0.621                         | 0.016                      |
| 0.75       | 1.153                         | 0.001                      | 1.174                         | 0.001                      | 1.157                         | 0.001                      | 1.161                         | 0.010                      | 1.621             | 0.730                                                                    | 0.704                            | 0.730                            | 0.721                         | 0.014                      |
| 1          | 1.082                         | 0.001                      | 1.094                         | 0.001                      | 1.074                         | 0.001                      | 1.083                         | 0.010                      | 1.738             | 0.801                                                                    | 0.784                            | 0.813                            | 0.799                         | 0.014                      |
| 2          | 0.886                         | 0.001                      | 0.877                         | 0.001                      | 0.865                         | 0.001                      | 0.876                         | 0.010                      | 2.149             | 0.998                                                                    | 1.001                            | 1.022                            | 1.007                         | 0.013                      |
| 3          | 0.800                         | 0.001                      | 0.819                         | 0.001                      | 0.807                         | 0.001                      | 0.809                         | 0.009                      | 2.328             | 1.083                                                                    | 1.059                            | 1.080                            | 1.074                         | 0.013                      |
| 4          | 0.735                         | 0.001                      | 0.754                         | 0.001                      | 0.743                         | 0.001                      | 0.744                         | 0.009                      | 2.530             | 1.149                                                                    | 1.124                            | 1.144                            | 1.139                         | 0.013                      |
| 5          | 0.702                         | 0.001                      | 0.710                         | 0.001                      | 0.696                         | 0.001                      | 0.703                         | 0.007                      | 2.679             | 1.182                                                                    | 1.168                            | 1.191                            | 1.180                         | 0.011                      |
| 6          | 0.665                         | 0.001                      | 0.677                         | 0.001                      | 0.662                         | 0.001                      | 0.668                         | 0.007                      | 2.818             | 1.218                                                                    | 1.201                            | 1.225                            | 1.215                         | 0.012                      |
| 7          | 0.652                         | 0.001                      | 0.656                         | 0.001                      | 0.638                         | 0.001                      | 0.649                         | 0.009                      | 2.900             | 1.231                                                                    | 1.222                            | 1.249                            | 1.234                         | 0.013                      |
| 8          | 0.634                         | 0.001                      | 0.650                         | 0.001                      | 0.632                         | 0.001                      | 0.639                         | 0.010                      | 2.947             | 1.250                                                                    | 1.228                            | 1.255                            | 1.244                         | 0.014                      |
| 9          | 0.607                         | 0.001                      | 0.616                         | 0.001                      | 0.599                         | 0.001                      | 0.608                         | 0.008                      | 3.097             | 1.276                                                                    | 1.261                            | 1.288                            | 1.275                         | 0.013                      |
| 10         | 0.602                         | 0.001                      | 0.615                         | 0.001                      | 0.596                         | 0.001                      | 0.604                         | 0.009                      | 3.114             | 1.281                                                                    | 1.263                            | 1.291                            | 1.278                         | 0.014                      |
| 15         | 0.547                         | 0.001                      | 0.560                         | 0.001                      | 0.542                         | 0.001                      | 0.550                         | 0.009                      | 3.423             | 1.336                                                                    | 1.318                            | 1.345                            | 1.333                         | 0.013                      |
| 20         | 0.515                         | 0.001                      | 0.531                         | 0.001                      | 0.514                         | 0.001                      | 0.520                         | 0.009                      | 3.618             | 1.368                                                                    | 1.347                            | 1.373                            | 1.363                         | 0.013                      |
| 30         | 0.476                         | 0.001                      | 0.488                         | 0.001                      | 0.470                         | 0.001                      | 0.478                         | 0.008                      | 3.938             | 1.408                                                                    | 1.390                            | 1.417                            | 1.405                         | 0.013                      |
| 50         | 0.456                         | 0.001                      | 0.473                         | 0.001                      | 0.462                         | 0.001                      | 0.464                         | 0.009                      | 4.057             | 1.428                                                                    | 1.404                            | 1.425                            | 1.419                         | 0.012                      |
| 100        | 0.455                         | 0.001                      | 0.472                         | 0.001                      | 0.456                         | 0.001                      | 0.461                         | 0.009                      | 4.083             | 1.429                                                                    | 1.406                            | 1.431                            | 1.422                         | 0.013                      |

<sup>a</sup> Average value (mean) of 100 luminescence lifetime measurements (in microseconds) calculated as:  $\bar{\tau} = \frac{1}{n} \sum_{i=1}^n \tau_i$ ; <sup>b</sup> Standard deviation value (s) of 100 luminescence lifetime measurements (in microseconds) calculated as:  $s = \left( \frac{1}{n-1} \sum_{i=1}^n (\tau_i - \bar{\tau})^2 \right)^{1/2}$ ; <sup>c</sup> Mean of the average luminescence-lifetime values ( $\bar{\tau}$ , in microseconds) obtained for each replica, calculated as:  $\bar{\mu}_{avg} = \frac{1}{3} \sum_{i=1}^3 \bar{\tau}_i$ ; <sup>d</sup> Standard deviation value (s) of the average luminescence-lifetime values ( $\bar{\tau}_i$ , in microseconds) obtained for each replica, calculated as:  $s = \left( \frac{1}{3-1} \sum_{i=1}^3 (\bar{\tau}_i - \bar{\mu}_{avg})^2 \right)^{1/2}$ ; <sup>e</sup> Ratio between the average luminescence-lifetime value,  $\bar{\tau}_{avg}$ , at 0% oxygen and any oxygen concentration (i.e.,  $\bar{\tau}_{avg}(0\% pO_2) / \bar{\tau}_{avg}(x\% pO_2)$ ); <sup>f</sup> Average lifetime difference (in microseconds) between the average luminescence-lifetime value,  $\bar{\tau}_i$ , at 0% oxygen and any oxygen concentration (i.e.,  $\bar{\tau}_i(0\% pO_2) - \bar{\tau}_i(x\% pO_2)$ ); <sup>g</sup> Average value (mean) of the 3 average lifetime difference values obtained for each replica (in microseconds); <sup>h</sup> Standard deviation value (s) of the 3 average lifetime difference values obtained for each replica (in microseconds).

**Table ESI-14.** Phase-shift measurements for ultra-low oxygen concentrations between 0 and 0.26% O<sub>2</sub> of PtTFPP immobilized into AP200/19 in triplicate at 21°C. Modulation frequency of 40100 Hz.

| $pO_2$ (%) | Replica #1               |                       | Replica #2               |                       | Replica #3               |                       | Average results          |                       | $\Phi_0/\Phi_x$ <sup>e</sup> | Phase difference ( $\Phi_{0\% pO_2} - \Phi_{x\%}$ ) |                             |                             |                          |                       |
|------------|--------------------------|-----------------------|--------------------------|-----------------------|--------------------------|-----------------------|--------------------------|-----------------------|------------------------------|-----------------------------------------------------|-----------------------------|-----------------------------|--------------------------|-----------------------|
|            | mean<br>(°) <sup>a</sup> | s<br>(°) <sup>b</sup> | mean<br>(°) <sup>a</sup> | s<br>(°) <sup>b</sup> | mean<br>(°) <sup>a</sup> | s<br>(°) <sup>b</sup> | mean<br>(°) <sup>c</sup> | s<br>(°) <sup>d</sup> |                              | Rep. #1<br>(°) <sup>f</sup>                         | Rep. #2<br>(°) <sup>f</sup> | Rep. #3<br>(°) <sup>f</sup> | mean<br>(°) <sup>g</sup> | s<br>(°) <sup>h</sup> |
| 0.00       | 87.736                   | 0.075                 | 87.614                   | 0.069                 | 87.892                   | 0.085                 | 87.747                   | 0.139                 | 1.000                        | 0.000                                               | 0.000                       | 0.000                       | 0.000                    | 0.000                 |
| 0.05       | 84.068                   | 0.086                 | 84.114                   | 0.077                 | 84.086                   | 0.079                 | 84.089                   | 0.023                 | 1.043                        | 3.668                                               | 3.500                       | 3.806                       | 3.658                    | 0.153                 |
| 0.10       | 81.013                   | 0.070                 | 80.954                   | 0.061                 | 80.873                   | 0.065                 | 80.946                   | 0.070                 | 1.084                        | 6.723                                               | 6.660                       | 7.019                       | 6.800                    | 0.191                 |
| 0.15       | 78.427                   | 0.054                 | 78.461                   | 0.060                 | 78.563                   | 0.049                 | 78.483                   | 0.070                 | 1.118                        | 9.309                                               | 9.153                       | 9.329                       | 9.263                    | 0.096                 |
| 0.21       | 76.241                   | 0.066                 | 76.408                   | 0.062                 | 76.367                   | 0.061                 | 76.338                   | 0.087                 | 1.149                        | 11.495                                              | 11.206                      | 11.525                      | 11.408                   | 0.176                 |
| 0.26       | 74.322                   | 0.066                 | 74.425                   | 0.057                 | 74.493                   | 0.063                 | 74.413                   | 0.086                 | 1.179                        | 13.414                                              | 13.189                      | 13.399                      | 13.334                   | 0.125                 |

<sup>a</sup> Average value (mean) of 100 phase-shift measurements (in degrees) calculated as:  $\bar{\phi} = \frac{1}{n} \sum_{i=1}^n \phi_i$ ; <sup>b</sup> Standard deviation value (s) of 100 phase-shift measurements (in degrees) calculated as:  $s = \left( \frac{1}{n-1} \sum_{i=1}^n (\phi_i - \bar{\phi})^2 \right)^{1/2}$ ; <sup>c</sup> Mean of the average phase-shift values ( $\bar{\phi}$ , in degrees) obtained for each replica, calculated as:  $\bar{\phi}_{avg} = \frac{1}{3} \sum_{i=1}^3 \bar{\phi}_i$ ; <sup>d</sup> Standard deviation value (s) of the average phase-shift values ( $\bar{\phi}_i$ , in degrees) obtained for each replica, calculated as:  $s = \left( \frac{1}{3-1} \sum_{i=1}^3 (\bar{\phi}_i - \bar{\phi}_{avg})^2 \right)^{1/2}$ ; <sup>e</sup> Ratio between the average phase-shift value,  $\bar{\phi}_{avg}$ , at 0% oxygen and any oxygen concentration (i.e.,  $\bar{\phi}_{avg}(0\% pO_2) / \bar{\phi}_{avg}(x\% pO_2)$ ); <sup>f</sup> Average phase difference (in degrees) between the average phase-shift value,  $\bar{\phi}_i$ , at 0% oxygen and any oxygen concentration (i.e.,  $\bar{\phi}_i(0\% pO_2) - \bar{\phi}_i(x\% pO_2)$ ); <sup>g</sup> Average value (mean) of the 3 average phase difference values obtained for each replica (in degrees); <sup>h</sup> Standard deviation value (s) of the 3 average phase difference values obtained for each replica (in degrees).

**Table ESI-15.** Luminescence lifetime measurements for ultra-low oxygen concentrations between 0 and 0.26% O<sub>2</sub> of PtTFPP immobilized into AP200/19 in triplicate at 21° C. Modulation frequency of 40100 Hz.

| $pO_2$ (%) | Replica #1                       |                               | Replica #2                       |                               | Replica #3                       |                               | Average results                  |                               | $\tau_0/\tau_x^e$ | Luminescence lifetime difference ( $\tau_{x\% pO_2} - \tau_{0\% pO_2}$ ) |                                     |                                     |                                  |                               |
|------------|----------------------------------|-------------------------------|----------------------------------|-------------------------------|----------------------------------|-------------------------------|----------------------------------|-------------------------------|-------------------|--------------------------------------------------------------------------|-------------------------------------|-------------------------------------|----------------------------------|-------------------------------|
|            | mean<br>( $\mu s$ ) <sup>a</sup> | s<br>( $\mu s$ ) <sup>b</sup> | mean<br>( $\mu s$ ) <sup>a</sup> | s<br>( $\mu s$ ) <sup>b</sup> | mean<br>( $\mu s$ ) <sup>a</sup> | s<br>( $\mu s$ ) <sup>b</sup> | mean<br>( $\mu s$ ) <sup>c</sup> | s<br>( $\mu s$ ) <sup>d</sup> |                   | Rep. #1<br>( $\mu s$ ) <sup>f</sup>                                      | Rep. #2<br>( $\mu s$ ) <sup>f</sup> | Rep. #3<br>( $\mu s$ ) <sup>f</sup> | mean<br>( $\mu s$ ) <sup>g</sup> | s<br>( $\mu s$ ) <sup>h</sup> |
| 0.00       | 100.391                          | 1.475                         | 95.252                           | 1.480                         | 101.828                          | 1.471                         | 99.157                           | 3.457                         | 1.000             | 0.000                                                                    | 0.000                               | 0.000                               | 0.000                            | 0.000                         |
| 0.05       | 38.198                           | 0.396                         | 38.498                           | 0.401                         | 38.315                           | 0.391                         | 38.337                           | 0.151                         | 2.586             | 62.193                                                                   | 56.753                              | 63.512                              | 60.820                           | 3.582                         |
| 0.10       | 25.095                           | 0.160                         | 24.929                           | 0.165                         | 24.704                           | 0.156                         | 24.909                           | 0.196                         | 3.980             | 75.295                                                                   | 70.323                              | 77.123                              | 74.247                           | 3.519                         |
| 0.15       | 19.381                           | 0.079                         | 19.440                           | 0.084                         | 19.618                           | 0.075                         | 19.480                           | 0.123                         | 5.090             | 81.009                                                                   | 75.812                              | 82.209                              | 79.677                           | 3.400                         |
| 0.21       | 16.208                           | 0.071                         | 16.415                           | 0.076                         | 16.364                           | 0.067                         | 16.329                           | 0.107                         | 6.072             | 84.182                                                                   | 78.836                              | 85.463                              | 82.827                           | 3.515                         |
| 0.26       | 14.140                           | 0.056                         | 14.239                           | 0.062                         | 14.304                           | 0.052                         | 14.228                           | 0.082                         | 6.969             | 86.250                                                                   | 81.013                              | 87.523                              | 84.929                           | 3.450                         |

<sup>a</sup> Average value (mean) of 100 luminescence lifetime measurements (in microseconds) calculated as:  $\bar{\tau} = \frac{1}{n} \sum_{i=1}^n \tau_i$ ; <sup>b</sup> Standard deviation value (s) of 100 luminescence lifetime measurements (in microseconds) calculated as:  $s = \left( \frac{1}{n-1} \sum_{i=1}^n (\tau_i - \bar{\tau})^2 \right)^{1/2}$ ; <sup>c</sup> Mean of the average luminescence-lifetime values ( $\bar{\tau}$ , in microseconds) obtained for each replica, calculated as:  $\bar{\mu}_{avg} = \frac{1}{3} \sum_{i=1}^3 \bar{\tau}_i$ ; <sup>d</sup> Standard deviation value (s) of the average luminescence-lifetime values ( $\bar{\tau}_i$ , in microseconds) obtained for each replica, calculated as:  $s = \left( \frac{1}{3-1} \sum_{i=1}^3 (\bar{\tau}_i - \bar{\mu}_{avg})^2 \right)^{1/2}$ ; <sup>e</sup> Ratio between the average luminescence-lifetime value,  $\bar{\tau}_{avg}$ , at 0% oxygen and any oxygen concentration (i.e.,  $\bar{\tau}_{avg(0\% pO_2)} / \bar{\tau}_{avg(x\% pO_2)}$ ); <sup>f</sup> Average lifetime difference (in microseconds) between the average luminescence-lifetime value,  $\bar{\tau}_i$ , at 0% oxygen and any oxygen concentration (i.e.,  $\bar{\tau}_i(0\% pO_2) - \bar{\tau}_i(x\% pO_2)$ ); <sup>g</sup> Average value (mean) of the 3 average lifetime difference values obtained for each replica (in microseconds); <sup>h</sup> Standard deviation value (s) of the 3 average lifetime difference values obtained for each replica (in microseconds).

**Table ESI-16.** Phase-shift measurements for ultra-low oxygen concentrations between 0 and 0.26% O<sub>2</sub> of N969 immobilized into AP200/19 in triplicate at 21°C. Modulation frequency of 94100 Hz.

| $pO_2$ (%) | Replica #1       |                  | Replica #2       |                  | Replica #3       |                  | Average results  |                  | $\Phi_0/\Phi_x$ <sup>e</sup> | Phase difference ( $\Phi_{0\% pO_2} - \Phi_{x\%}$ ) |                  |                  |                  |                  |
|------------|------------------|------------------|------------------|------------------|------------------|------------------|------------------|------------------|------------------------------|-----------------------------------------------------|------------------|------------------|------------------|------------------|
|            | mean             | s                | mean             | s                | mean             | s                | mean             | s                |                              | Rep. #1                                             | Rep. #2          | Rep. #3          | mean             | s                |
|            | (°) <sup>a</sup> | (°) <sup>b</sup> | (°) <sup>a</sup> | (°) <sup>b</sup> | (°) <sup>a</sup> | (°) <sup>b</sup> | (°) <sup>c</sup> | (°) <sup>d</sup> |                              | (°) <sup>f</sup>                                    | (°) <sup>f</sup> | (°) <sup>f</sup> | (°) <sup>g</sup> | (°) <sup>h</sup> |
| 0.00       | 65.678           | 0.026            | 65.699           | 0.024            | 65.767           | 0.025            | 65.714           | 0.046            | 1.000                        | 0.000                                               | 0.000            | 0.000            | 0.000            | 0.000            |
| 0.05       | 61.748           | 0.008            | 61.614           | 0.008            | 61.757           | 0.007            | 61.706           | 0.080            | 1.065                        | 3.930                                               | 4.085            | 4.010            | 4.008            | 0.077            |
| 0.10       | 58.807           | 0.007            | 58.891           | 0.009            | 58.837           | 0.007            | 58.845           | 0.042            | 1.116                        | 6.871                                               | 6.808            | 6.930            | 6.869            | 0.061            |
| 0.15       | 56.550           | 0.009            | 56.439           | 0.009            | 56.596           | 0.009            | 56.528           | 0.080            | 1.162                        | 9.128                                               | 9.260            | 9.171            | 9.186            | 0.067            |
| 0.21       | 54.649           | 0.007            | 54.640           | 0.006            | 54.724           | 0.007            | 54.671           | 0.046            | 1.202                        | 11.029                                              | 11.059           | 11.043           | 11.043           | 0.015            |
| 0.26       | 53.000           | 0.007            | 52.951           | 0.005            | 52.875           | 0.005            | 52.942           | 0.063            | 1.241                        | 12.678                                              | 12.748           | 12.892           | 12.772           | 0.109            |

<sup>a</sup> Average value (mean) of 100 phase-shift measurements (in degrees) calculated as:  $\bar{\phi} = \frac{1}{n} \sum_{i=1}^n \phi_i$ ; <sup>b</sup> Standard deviation value (s) of 100 phase-shift measurements (in degrees) calculated as:  $s = \left( \frac{1}{n-1} \sum_{i=1}^n (\phi_i - \bar{\phi})^2 \right)^{1/2}$ ; <sup>c</sup> Mean of the average phase-shift values ( $\bar{\phi}$ , in degrees) obtained for each replica, calculated as:  $\bar{\phi}_{avg} = \frac{1}{3} \sum_{i=1}^3 \bar{\phi}_i$ ; <sup>d</sup> Standard deviation value (s) of the average phase-shift values ( $\bar{\phi}_i$ , in degrees) obtained for each replica, calculated as:  $s = \left( \frac{1}{3-1} \sum_{i=1}^3 (\bar{\phi}_i - \bar{\phi}_{avg})^2 \right)^{1/2}$ ; <sup>e</sup> Ratio between the average phase-shift value,  $\bar{\phi}_{avg}$ , at 0% oxygen and any oxygen concentration (i.e.,  $\bar{\phi}_{avg}(0\% pO_2) / \bar{\phi}_{avg}(x\% pO_2)$ ); <sup>f</sup> Average phase difference (in degrees) between the average phase-shift value,  $\bar{\phi}_i$ , at 0% oxygen and any oxygen concentration (i.e.,  $\bar{\phi}_i(0\% pO_2) - \bar{\phi}_i(x\% pO_2)$ ); <sup>g</sup> Average value (mean) of the 3 average phase difference values obtained for each replica (in degrees); <sup>h</sup> Standard deviation value (s) of the 3 average phase difference values obtained for each replica (in degrees).

**Table ESI-17.** Luminescence lifetime measurements for ultra-low oxygen concentrations between 0 and 0.26% O<sub>2</sub> of N969 immobilized into AP200/19 in triplicate at 21° C. Modulation frequency of 94100 Hz.

| $pO_2(\%)$ | Replica #1               |                          | Replica #2               |                          | Replica #3               |                          | Average results          |                          | $\tau_0/\tau_x^e$ | Luminescence lifetime difference ( $\tau_{x\% pO_2} - \tau_{0\% pO_2}$ ) |                          |                          |                          |                          |
|------------|--------------------------|--------------------------|--------------------------|--------------------------|--------------------------|--------------------------|--------------------------|--------------------------|-------------------|--------------------------------------------------------------------------|--------------------------|--------------------------|--------------------------|--------------------------|
|            | mean                     | s                        | mean                     | s                        | mean                     | s                        | mean                     | s                        |                   | Rep. #1                                                                  | Rep. #2                  | Rep. #3                  | mean                     | s                        |
|            | ( $\mu s$ ) <sup>a</sup> | ( $\mu s$ ) <sup>b</sup> | ( $\mu s$ ) <sup>a</sup> | ( $\mu s$ ) <sup>b</sup> | ( $\mu s$ ) <sup>a</sup> | ( $\mu s$ ) <sup>b</sup> | ( $\mu s$ ) <sup>c</sup> | ( $\mu s$ ) <sup>d</sup> |                   | ( $\mu s$ ) <sup>f</sup>                                                 | ( $\mu s$ ) <sup>f</sup> | ( $\mu s$ ) <sup>f</sup> | ( $\mu s$ ) <sup>g</sup> | ( $\mu s$ ) <sup>h</sup> |
| 0.00       | 3.742                    | 0.004                    | 3.745                    | 0.004                    | 3.757                    | 0.002                    | 3.748                    | 0.008                    | 1.000             | 0.000                                                                    | 0.000                    | 0.000                    | 0.000                    | 0.000                    |
| 0.05       | 3.147                    | 0.003                    | 3.129                    | 0.002                    | 3.148                    | 0.001                    | 3.142                    | 0.010                    | 1.193             | 0.594                                                                    | 0.615                    | 0.608                    | 0.606                    | 0.010                    |
| 0.10       | 2.793                    | 0.003                    | 2.802                    | 0.003                    | 2.796                    | 0.001                    | 2.797                    | 0.004                    | 1.339             | 0.948                                                                    | 0.942                    | 0.960                    | 0.950                    | 0.009                    |
| 0.15       | 2.560                    | 0.002                    | 2.549                    | 0.002                    | 2.564                    | 0.001                    | 2.558                    | 0.007                    | 1.465             | 1.181                                                                    | 1.196                    | 1.192                    | 1.190                    | 0.007                    |
| 0.21       | 2.384                    | 0.002                    | 2.383                    | 0.002                    | 2.390                    | 0.001                    | 2.386                    | 0.004                    | 1.570             | 1.357                                                                    | 1.362                    | 1.366                    | 1.362                    | 0.004                    |
| 0.26       | 2.244                    | 0.002                    | 2.240                    | 0.001                    | 2.234                    | 0.001                    | 2.239                    | 0.005                    | 1.673             | 1.497                                                                    | 1.505                    | 1.523                    | 1.508                    | 0.013                    |

<sup>a</sup> Average value (mean) of 100 luminescence lifetime measurements (in microseconds) calculated as:  $\bar{\tau} = \frac{1}{n} \sum_{i=1}^n \tau_i$ ; <sup>b</sup> Standard deviation value (s) of 100 luminescence lifetime measurements (in microseconds) calculated as:  $s = \left( \frac{1}{n-1} \sum_{i=1}^n (\tau_i - \bar{\tau})^2 \right)^{1/2}$ ; <sup>c</sup> Mean of the average luminescence-lifetime values ( $\bar{\tau}$ , in microseconds) obtained for each replica, calculated as:  $\bar{\mu}_{avg} = \frac{1}{3} \sum_{i=1}^3 \bar{\tau}_i$ ; <sup>d</sup> Standard deviation value (s) of the average luminescence-lifetime values ( $\bar{\tau}_i$ , in microseconds) obtained for each replica, calculated as:  $s = \left( \frac{1}{3-1} \sum_{i=1}^3 (\bar{\tau}_i - \bar{\mu}_{avg})^2 \right)^{1/2}$ ; <sup>e</sup> Ratio between the average luminescence-lifetime value,  $\bar{\tau}_{avg}$ , at 0% oxygen and any oxygen concentration (i.e.,  $\bar{\tau}_{avg}(0\% pO_2) / \bar{\tau}_{avg}(x\% pO_2)$ ); <sup>f</sup> Average lifetime difference (in microseconds) between the average luminescence-lifetime value,  $\bar{\tau}_i$ , at 0% oxygen and any oxygen concentration (i.e.,  $\bar{\tau}_i(0\% pO_2) - \bar{\tau}_i(x\% pO_2)$ ); <sup>g</sup> Average value (mean) of the 3 average lifetime difference values obtained for each replica (in microseconds); <sup>h</sup> Standard deviation value (s) of the 3 average lifetime difference values obtained for each replica (in microseconds).



**Table ESI-18.** Phase-shift measurements for ultra-low oxygen concentrations between 0 and 0.26% O<sub>2</sub> of N1008 immobilized into AP200/19 in triplicate at 21°C. Modulation frequency of 30100 Hz.

| $pO_2$ (%) | Replica #1               |                       | Replica #2               |                       | Replica #3               |                       | Average results          |                       | $\Phi_0/\Phi_x^e$ | Phase difference ( $\Phi_{0\% pO_2} - \Phi_{x\%}$ ) |                             |                             |                          |                       |
|------------|--------------------------|-----------------------|--------------------------|-----------------------|--------------------------|-----------------------|--------------------------|-----------------------|-------------------|-----------------------------------------------------|-----------------------------|-----------------------------|--------------------------|-----------------------|
|            | mean<br>(°) <sup>a</sup> | s<br>(°) <sup>b</sup> | mean<br>(°) <sup>a</sup> | s<br>(°) <sup>b</sup> | mean<br>(°) <sup>a</sup> | s<br>(°) <sup>b</sup> | mean<br>(°) <sup>c</sup> | s<br>(°) <sup>d</sup> |                   | Rep. #1<br>(°) <sup>f</sup>                         | Rep. #2<br>(°) <sup>f</sup> | Rep. #3<br>(°) <sup>f</sup> | mean<br>(°) <sup>g</sup> | s<br>(°) <sup>h</sup> |
| 0.00       | 57.926                   | 0.088                 | 57.821                   | 0.089                 | 57.801                   | 0.087                 | 57.849                   | 0.067                 | 1.000             | 0.000                                               | 0.000                       | 0.000                       | 0.000                    | 0.000                 |
| 0.05       | 57.031                   | 0.008                 | 57.042                   | 0.010                 | 56.959                   | 0.009                 | 57.010                   | 0.045                 | 1.014             | 0.895                                               | 0.779                       | 0.842                       | 0.838                    | 0.058                 |
| 0.10       | 55.885                   | 0.012                 | 55.759                   | 0.012                 | 55.865                   | 0.014                 | 55.836                   | 0.067                 | 1.036             | 2.041                                               | 2.062                       | 1.936                       | 2.013                    | 0.067                 |
| 0.15       | 54.773                   | 0.015                 | 54.655                   | 0.017                 | 54.677                   | 0.015                 | 54.701                   | 0.062                 | 1.057             | 3.153                                               | 3.166                       | 3.124                       | 3.147                    | 0.021                 |
| 0.21       | 53.705                   | 0.017                 | 53.557                   | 0.018                 | 53.599                   | 0.015                 | 53.620                   | 0.076                 | 1.078             | 4.221                                               | 4.264                       | 4.202                       | 4.229                    | 0.031                 |
| 0.26       | 52.697                   | 0.017                 | 52.792                   | 0.019                 | 52.807                   | 0.018                 | 52.765                   | 0.059                 | 1.096             | 5.229                                               | 5.029                       | 4.994                       | 5.084                    | 0.126                 |

<sup>a</sup> Average value (mean) of 100 phase-shift measurements (in degrees) calculated as:  $\bar{\phi} = \frac{1}{n} \sum_{i=1}^n \phi_i$ ; <sup>b</sup> Standard deviation value (s) of 100 phase-shift measurements (in degrees) calculated as:  $s = \left( \frac{1}{n-1} \sum_{i=1}^n (\phi_i - \bar{\phi})^2 \right)^{1/2}$ ; <sup>c</sup> Mean of the average phase-shift values ( $\bar{\phi}$ , in degrees) obtained for each replica, calculated as:  $\bar{\phi}_{avg} = \frac{1}{3} \sum_{i=1}^3 \bar{\phi}_i$ ; <sup>d</sup> Standard deviation value (s) of the average phase-shift values ( $\bar{\phi}_i$ , in degrees) obtained for each replica, calculated as:  $s = \left( \frac{1}{3-1} \sum_{i=1}^3 (\bar{\phi}_i - \bar{\phi}_{avg})^2 \right)^{1/2}$ ; <sup>e</sup> Ratio between the average phase-shift value,  $\bar{\phi}_{avg}$ , at 0% oxygen and any oxygen concentration (i.e.,  $\bar{\phi}_{avg}(0\% pO_2) / \bar{\phi}_{avg}(x\% pO_2)$ ); <sup>f</sup> Average phase difference (in degrees) between the average phase-shift value,  $\bar{\phi}_i$ , at 0% oxygen and any oxygen concentration (i.e.,  $\bar{\phi}_i(0\% pO_2) - \bar{\phi}_i(x\% pO_2)$ ); <sup>g</sup> Average value (mean) of the 3 average phase difference values obtained for each replica (in degrees); <sup>h</sup> Standard deviation value (s) of the 3 average phase difference values obtained for each replica (in degrees).

**Table ESI-19.** Luminescence lifetime measurements for ultra-low oxygen concentrations between 0 and 0.26% O<sub>2</sub> of N1008 immobilized into AP200/19 in triplicate at 21° C. Modulation frequency of 30100 Hz.

| <i>p</i> O <sub>2</sub> (%) | Replica #1              |                         | Replica #2              |                         | Replica #3              |                         | Average results         |                         | $\tau_0/\tau_x^e$ | Luminescence lifetime difference ( $\tau_{x\% pO_2} - \tau_{0\% pO_2}$ ) |                         |                         |                         |                         |
|-----------------------------|-------------------------|-------------------------|-------------------------|-------------------------|-------------------------|-------------------------|-------------------------|-------------------------|-------------------|--------------------------------------------------------------------------|-------------------------|-------------------------|-------------------------|-------------------------|
|                             | mean                    | s                       | mean                    | s                       | mean                    | s                       | mean                    | s                       |                   | Rep. #1                                                                  | Rep. #2                 | Rep. #3                 | mean                    | s                       |
|                             | ( $\mu$ s) <sup>a</sup> | ( $\mu$ s) <sup>b</sup> | ( $\mu$ s) <sup>a</sup> | ( $\mu$ s) <sup>b</sup> | ( $\mu$ s) <sup>a</sup> | ( $\mu$ s) <sup>b</sup> | ( $\mu$ s) <sup>c</sup> | ( $\mu$ s) <sup>d</sup> |                   | ( $\mu$ s) <sup>f</sup>                                                  | ( $\mu$ s) <sup>f</sup> | ( $\mu$ s) <sup>f</sup> | ( $\mu$ s) <sup>g</sup> | ( $\mu$ s) <sup>h</sup> |
| 0.00                        | 8.437                   | 0.007                   | 8.403                   | 0.006                   | 8.396                   | 0.005                   | 8.412                   | 0.021                   | 1.000             | 0.000                                                                    | 0.000                   | 0.000                   | 0.000                   | 0.000                   |
| 0.05                        | 8.151                   | 0.006                   | 8.155                   | 0.005                   | 8.129                   | 0.004                   | 8.145                   | 0.014                   | 1.032             | 0.286                                                                    | 0.248                   | 0.267                   | 0.267                   | 0.019                   |
| 0.10                        | 7.805                   | 0.005                   | 7.768                   | 0.004                   | 7.799                   | 0.004                   | 7.790                   | 0.019                   | 1.079             | 0.632                                                                    | 0.635                   | 0.597                   | 0.621                   | 0.021                   |
| 0.15                        | 7.488                   | 0.005                   | 7.455                   | 0.004                   | 7.461                   | 0.005                   | 7.468                   | 0.017                   | 1.126             | 0.949                                                                    | 0.948                   | 0.935                   | 0.944                   | 0.007                   |
| 0.21                        | 7.199                   | 0.004                   | 7.160                   | 0.003                   | 7.171                   | 0.004                   | 7.176                   | 0.020                   | 1.172             | 1.238                                                                    | 1.243                   | 1.225                   | 1.235                   | 0.009                   |
| 0.26                        | 6.940                   | 0.005                   | 6.964                   | 0.005                   | 6.967                   | 0.006                   | 6.957                   | 0.014                   | 1.209             | 1.497                                                                    | 1.439                   | 1.429                   | 1.455                   | 0.036                   |

<sup>a</sup> Average value (mean) of 100 luminescence lifetime measurements (in microseconds) calculated as:  $\bar{\tau} = \frac{1}{n} \sum_{i=1}^n \tau_i$ ; <sup>b</sup> Standard deviation value (s) of 100 luminescence lifetime measurements (in microseconds) calculated as:  $s = \left( \frac{1}{n-1} \sum_{i=1}^n (\tau_i - \bar{\tau})^2 \right)^{1/2}$ ; <sup>c</sup> Mean of the average luminescence-lifetime values ( $\bar{\tau}$ , in microseconds) obtained for each replica, calculated as:  $\bar{\mu}_{avg} = \frac{1}{3} \sum_{i=1}^3 \bar{\tau}_i$ ; <sup>d</sup> Standard deviation value (s) of the average luminescence-lifetime values ( $\bar{\tau}_i$ , in microseconds) obtained for each replica, calculated as:  $s = \left( \frac{1}{3-1} \sum_{i=1}^3 (\bar{\tau}_i - \bar{\mu}_{avg})^2 \right)^{1/2}$ ; <sup>e</sup> Ratio between the average luminescence-lifetime value,  $\bar{\tau}_{avg}$ , at 0% oxygen and any oxygen concentration (i.e.,  $\bar{\tau}_{avg}(0\% pO_2) / \bar{\tau}_{avg}(x\% pO_2)$ ); <sup>f</sup> Average lifetime difference (in microseconds) between the average luminescence-lifetime value,  $\bar{\tau}_i$ , at 0% oxygen and any oxygen concentration (i.e.,  $\bar{\tau}_i(0\% pO_2) - \bar{\tau}_i(x\% pO_2)$ ); <sup>g</sup> Average value (mean) of the 3 average lifetime difference values obtained for each replica (in microseconds); <sup>h</sup> Standard deviation value (s) of the 3 average lifetime difference values obtained for each replica (in microseconds).

**Table ESI-20.** Phase-shift measurements for ultra-low oxygen concentrations between 0 and 0.26% O<sub>2</sub> of EB146 immobilized into AP200/19 in triplicate at 21°C. Modulation frequency of 94100 Hz.

| $pO_2$ (%) | Replica #1               |                       | Replica #2               |                       | Replica #3               |                       | Average results          |                       | $\Phi_0/\Phi_x^e$ | Phase difference ( $\Phi_{0\% pO_2} - \Phi_{x\%}$ ) |                             |                             |                          |                       |
|------------|--------------------------|-----------------------|--------------------------|-----------------------|--------------------------|-----------------------|--------------------------|-----------------------|-------------------|-----------------------------------------------------|-----------------------------|-----------------------------|--------------------------|-----------------------|
|            | mean<br>(°) <sup>a</sup> | s<br>(°) <sup>b</sup> | mean<br>(°) <sup>a</sup> | s<br>(°) <sup>b</sup> | mean<br>(°) <sup>a</sup> | s<br>(°) <sup>b</sup> | mean<br>(°) <sup>c</sup> | s<br>(°) <sup>d</sup> |                   | Rep. #1<br>(°) <sup>f</sup>                         | Rep. #2<br>(°) <sup>f</sup> | Rep. #3<br>(°) <sup>f</sup> | mean<br>(°) <sup>g</sup> | s<br>(°) <sup>h</sup> |
| 0.00       | 48.028                   | 0.069                 | 47.922                   | 0.071                 | 47.893                   | 0.051                 | 47.947                   | 0.071                 | 1.000             | 0.000                                               | 0.000                       | 0.000                       | 0.000                    | 0.000                 |
| 0.05       | 45.787                   | 0.012                 | 45.824                   | 0.022                 | 45.921                   | 0.032                 | 45.844                   | 0.069                 | 1.045             | 2.241                                               | 2.098                       | 1.972                       | 2.103                    | 0.134                 |
| 0.10       | 43.897                   | 0.041                 | 43.901                   | 0.011                 | 43.894                   | 0.020                 | 43.897                   | 0.003                 | 1.092             | 4.131                                               | 4.021                       | 3.999                       | 4.050                    | 0.070                 |
| 0.15       | 43.091                   | 0.017                 | 42.964                   | 0.016                 | 43.211                   | 0.017                 | 43.088                   | 0.123                 | 1.112             | 4.937                                               | 4.958                       | 4.682                       | 4.859                    | 0.153                 |
| 0.21       | 41.813                   | 0.010                 | 41.700                   | 0.009                 | 41.697                   | 0.011                 | 41.736                   | 0.066                 | 1.148             | 6.215                                               | 6.222                       | 6.196                       | 6.211                    | 0.013                 |
| 0.26       | 40.558                   | 0.008                 | 40.480                   | 0.007                 | 40.525                   | 0.007                 | 40.521                   | 0.039                 | 1.183             | 7.470                                               | 7.442                       | 7.368                       | 7.426                    | 0.052                 |

<sup>a</sup> Average value (mean) of 100 phase-shift measurements (in degrees) calculated as:  $\bar{\phi} = \frac{1}{n} \sum_{i=1}^n \phi_i$ ; <sup>b</sup> Standard deviation value (s) of 100 phase-shift measurements (in degrees) calculated as:  $s = \left( \frac{1}{n-1} \sum_{i=1}^n (\phi_i - \bar{\phi})^2 \right)^{1/2}$ ; <sup>c</sup> Mean of the average phase-shift values ( $\bar{\phi}$ , in degrees) obtained for each replica, calculated as:  $\bar{\phi}_{avg} = \frac{1}{3} \sum_{i=1}^3 \bar{\phi}_i$ ; <sup>d</sup> Standard deviation value (s) of the average phase-shift values ( $\bar{\phi}_i$ , in degrees) obtained for each replica, calculated as:  $s = \left( \frac{1}{3-1} \sum_{i=1}^3 (\bar{\phi}_i - \bar{\phi}_{avg})^2 \right)^{1/2}$ ; <sup>e</sup> Ratio between the average phase-shift value,  $\bar{\phi}_{avg}$ , at 0% oxygen and any oxygen concentration (i.e.,  $\bar{\phi}_{avg}(0\% pO_2) / \bar{\phi}_{avg}(x\% pO_2)$ ); <sup>f</sup> Average phase difference (in degrees) between the average phase-shift value,  $\bar{\phi}_i$ , at 0% oxygen and any oxygen concentration (i.e.,  $\bar{\phi}_i(0\% pO_2) - \bar{\phi}_i(x\% pO_2)$ ); <sup>g</sup> Average value (mean) of the 3 average phase difference values obtained for each replica (in degrees); <sup>h</sup> Standard deviation value (s) of the 3 average phase difference values obtained for each replica (in degrees).

**Table ESI-21.** Luminescence lifetime measurements for ultra-low oxygen concentrations between 0 and 0.26% O<sub>2</sub> of EB146 immobilized into AP200/19 in triplicate at 21° C. Modulation frequency of 94100 Hz.

| $pO_2(\%)$ | Replica #1                       |                               | Replica #2                       |                               | Replica #3                       |                               | Average results                  |                               | $\tau_0/\tau_x^e$ | Luminescence lifetime difference ( $\tau_{x\% pO_2} - \tau_{0\% pO_2}$ ) |                                     |                                     |                                  |                               |
|------------|----------------------------------|-------------------------------|----------------------------------|-------------------------------|----------------------------------|-------------------------------|----------------------------------|-------------------------------|-------------------|--------------------------------------------------------------------------|-------------------------------------|-------------------------------------|----------------------------------|-------------------------------|
|            | mean<br>( $\mu s$ ) <sup>a</sup> | s<br>( $\mu s$ ) <sup>b</sup> | mean<br>( $\mu s$ ) <sup>a</sup> | s<br>( $\mu s$ ) <sup>b</sup> | mean<br>( $\mu s$ ) <sup>a</sup> | s<br>( $\mu s$ ) <sup>b</sup> | mean<br>( $\mu s$ ) <sup>c</sup> | s<br>( $\mu s$ ) <sup>d</sup> |                   | Rep. #1<br>( $\mu s$ ) <sup>f</sup>                                      | Rep. #2<br>( $\mu s$ ) <sup>f</sup> | Rep. #3<br>( $\mu s$ ) <sup>f</sup> | mean<br>( $\mu s$ ) <sup>g</sup> | s<br>( $\mu s$ ) <sup>h</sup> |
| 0.00       | 1.880                            | 0.002                         | 1.873                            | 0.002                         | 1.871                            | 0.002                         | 1.874                            | 0.004                         | 1.000             | 0.000                                                                    | 0.000                               | 0.000                               | 0.000                            | 0.000                         |
| 0.05       | 1.738                            | 0.001                         | 1.740                            | 0.002                         | 1.746                            | 0.001                         | 1.741                            | 0.004                         | 1.076             | 0.142                                                                    | 0.133                               | 0.125                               | 0.133                            | 0.008                         |
| 0.10       | 1.627                            | 0.001                         | 1.637                            | 0.001                         | 1.629                            | 0.001                         | 1.631                            | 0.005                         | 1.149             | 0.253                                                                    | 0.236                               | 0.242                               | 0.243                            | 0.008                         |
| 0.15       | 1.582                            | 0.001                         | 1.575                            | 0.001                         | 1.588                            | 0.001                         | 1.581                            | 0.006                         | 1.185             | 0.298                                                                    | 0.298                               | 0.283                               | 0.293                            | 0.008                         |
| 0.21       | 1.512                            | 0.001                         | 1.506                            | 0.001                         | 1.508                            | 0.001                         | 1.508                            | 0.003                         | 1.242             | 0.368                                                                    | 0.367                               | 0.363                               | 0.366                            | 0.002                         |
| 0.26       | 1.447                            | 0.001                         | 1.443                            | 0.001                         | 1.445                            | 0.001                         | 1.445                            | 0.002                         | 1.297             | 0.433                                                                    | 0.430                               | 0.426                               | 0.429                            | 0.003                         |

<sup>a</sup> Average value (mean) of 100 luminescence lifetime measurements (in microseconds) calculated as:  $\bar{\tau} = \frac{1}{n} \sum_{i=1}^n \tau_i$ ; <sup>b</sup> Standard deviation value (s) of 100 luminescence lifetime measurements (in microseconds) calculated as:  $s = \left( \frac{1}{n-1} \sum_{i=1}^n (\tau_i - \bar{\tau})^2 \right)^{1/2}$ ; <sup>c</sup> Mean of the average luminescence-lifetime values ( $\bar{\tau}$ , in microseconds) obtained for each replica, calculated as:  $\bar{\mu}_{avg} = \frac{1}{3} \sum_{i=1}^3 \bar{\tau}_i$ ; <sup>d</sup> Standard deviation value (s) of the average luminescence-lifetime values ( $\bar{\tau}_i$ , in microseconds) obtained for each replica, calculated as:  $s = \left( \frac{1}{3-1} \sum_{i=1}^3 (\bar{\tau}_i - \bar{\mu}_{avg})^2 \right)^{1/2}$ ; <sup>e</sup> Ratio between the average luminescence-lifetime value,  $\bar{\tau}_{avg}$ , at 0% oxygen and any oxygen concentration (i.e.,  $\bar{\tau}_{avg(0\% pO_2)} / \bar{\tau}_{avg(x\% pO_2)}$ ); <sup>f</sup> Average lifetime difference (in microseconds) between the average luminescence-lifetime value,  $\bar{\tau}_i$ , at 0% oxygen and any oxygen concentration (i.e.,  $\bar{\tau}_i(0\% pO_2) - \bar{\tau}_i(x\% pO_2)$ ); <sup>g</sup> Average value (mean) of the 3 average lifetime difference values obtained for each replica (in microseconds); <sup>h</sup> Standard deviation value (s) of the 3 average lifetime difference values obtained for each replica (in microseconds).

**Table ESI-22.** Phase-shift measurements for different oxygen concentrations and several relative humidity of PtTFPP immobilized into AP200/19 at 21°C. Modulation frequency of 40100 Hz.

| $pO_2$ (%) | 0% Hum.                  |                       | 10% Hum.                 |                       | 20% Hum.                 |                       | 40% Hum.                 |                       | 60% Hum.                 |                       | 80% Hum.                 |                       |
|------------|--------------------------|-----------------------|--------------------------|-----------------------|--------------------------|-----------------------|--------------------------|-----------------------|--------------------------|-----------------------|--------------------------|-----------------------|
|            | mean<br>(°) <sup>a</sup> | s<br>(°) <sup>b</sup> |
| 0.00       | 87.734                   | 0.102                 | 87.861                   | 0.114                 | 87.849                   | 0.128                 | 88.238                   | 0.130                 | 88.351                   | 0.125                 | 88.232                   | 0.111                 |
| 0.25       | 74.602                   | 0.140                 | 73.964                   | 0.074                 | 74.348                   | 0.086                 | 74.584                   | 0.076                 | 74.704                   | 0.076                 | 74.470                   | 0.086                 |
| 0.50       | 66.489                   | 0.255                 | 65.385                   | 0.077                 | 65.695                   | 0.076                 | 65.968                   | 0.075                 | 66.058                   | 0.082                 | 65.961                   | 0.075                 |
| 0.75       | 60.354                   | 0.076                 | 60.210                   | 0.072                 | 60.538                   | 0.073                 | 60.834                   | 0.064                 | 60.888                   | 0.091                 | 60.809                   | 0.073                 |
| 1          | 57.502                   | 0.069                 | 57.626                   | 0.076                 | 58.005                   | 0.073                 | 58.254                   | 0.067                 | 58.324                   | 0.070                 | 58.222                   | 0.063                 |
| 2          | 47.770                   | 0.079                 | 47.926                   | 0.072                 | 48.368                   | 0.068                 | 48.672                   | 0.076                 | 48.723                   | 0.082                 | 48.612                   | 0.064                 |
| 3          | 43.765                   | 0.071                 | 44.024                   | 0.078                 | 44.464                   | 0.068                 | 44.821                   | 0.088                 | 44.791                   | 0.063                 | 44.689                   | 0.082                 |
| 4          | 41.418                   | 0.078                 | 41.721                   | 0.074                 | 42.160                   | 0.085                 | 42.522                   | 0.075                 | 42.502                   | 0.083                 | 42.383                   | 0.073                 |
| 5          | 39.379                   | 0.080                 | 39.700                   | 0.079                 | 40.146                   | 0.072                 | 40.550                   | 0.079                 | 40.466                   | 0.087                 | 40.388                   | 0.096                 |
| 6          | 37.958                   | 0.090                 | 38.391                   | 0.068                 | 38.821                   | 0.092                 | 39.213                   | 0.081                 | 39.128                   | 0.089                 | 39.106                   | 0.072                 |
| 7          | 36.908                   | 0.111                 | 37.281                   | 0.095                 | 37.787                   | 0.079                 | 38.133                   | 0.071                 | 38.011                   | 0.087                 | 37.936                   | 0.090                 |
| 8          | 36.559                   | 0.078                 | 36.924                   | 0.078                 | 37.435                   | 0.073                 | 37.794                   | 0.075                 | 37.641                   | 0.095                 | 37.646                   | 0.102                 |
| 9          | 35.552                   | 0.082                 | 35.938                   | 0.091                 | 36.450                   | 0.071                 | 36.802                   | 0.076                 | 36.611                   | 0.080                 | 36.770                   | 0.108                 |
| 10         | 34.527                   | 0.076                 | 34.951                   | 0.095                 | 35.434                   | 0.085                 | 35.826                   | 0.092                 | 35.572                   | 0.107                 | 35.838                   | 0.088                 |
| 15         | 32.565                   | 0.094                 | 33.048                   | 0.109                 | 33.538                   | 0.098                 | 33.908                   | 0.100                 | 33.605                   | 0.089                 | 34.257                   | 0.101                 |
| 20         | 31.125                   | 0.117                 | 31.625                   | 0.096                 | 32.131                   | 0.098                 | 32.478                   | 0.119                 | 32.162                   | 0.113                 | 33.098                   | 0.099                 |
| 30         | 29.422                   | 0.108                 | 29.992                   | 0.104                 | 30.508                   | 0.110                 | 30.854                   | 0.098                 | 30.460                   | 0.103                 | 31.990                   | 0.107                 |
| 50         | 27.722                   | 0.097                 | 28.382                   | 0.136                 | 28.950                   | 0.113                 | 29.305                   | 0.120                 | 30.000                   | 0.137                 | 31.344                   | 0.114                 |
| 100        | 26.373                   | 0.131                 | 26.921                   | 0.112                 | 27.466                   | 0.113                 | 27.824                   | 0.125                 | 27.502                   | 0.118                 | 28.622                   | 0.144                 |

<sup>a</sup> Average value (mean) of 100 phase-shift measurements (in degrees) calculated as:  $\bar{\phi} = \frac{1}{n} \sum_{i=1}^n \phi_i$ ; <sup>b</sup> Standard deviation value (s) of 100 phase-shift measurements (in degrees) calculated as:  $s = \left( \frac{1}{n-1} \sum_{i=1}^n (\phi_i - \bar{\phi})^2 \right)^{1/2}$ .

**Table ESI-23.** Luminescence lifetime measurements for different oxygen concentrations and several relative humidity of PtTFPP immobilized into AP200/19 at 21°C. Modulation frequency of 40100 Hz.

| $pO_2$ (%) | 0% Hum.                         |                              | 10% Hum.                        |                              | 20% Hum.                        |                              | 40% Hum.                        |                              | 60% Hum.                        |                              | 80% Hum.                        |                              |
|------------|---------------------------------|------------------------------|---------------------------------|------------------------------|---------------------------------|------------------------------|---------------------------------|------------------------------|---------------------------------|------------------------------|---------------------------------|------------------------------|
|            | mean<br>( $\mu$ s) <sup>a</sup> | s<br>( $\mu$ s) <sup>b</sup> | mean<br>( $\mu$ s) <sup>a</sup> | s<br>( $\mu$ s) <sup>b</sup> | mean<br>( $\mu$ s) <sup>a</sup> | s<br>( $\mu$ s) <sup>b</sup> | mean<br>( $\mu$ s) <sup>a</sup> | s<br>( $\mu$ s) <sup>b</sup> | mean<br>( $\mu$ s) <sup>a</sup> | s<br>( $\mu$ s) <sup>b</sup> | mean<br>( $\mu$ s) <sup>a</sup> | s<br>( $\mu$ s) <sup>b</sup> |
| 0.00       | 100.315                         | 1.207                        | 106.273                         | 1.437                        | 105.714                         | 1.238                        | 129.085                         | 1.339                        | 137.933                         | 1.428                        | 128.647                         | 1.677                        |
| 0.25       | 14.411                          | 0.013                        | 13.808                          | 0.023                        | 14.165                          | 0.015                        | 14.394                          | 0.019                        | 14.512                          | 0.011                        | 14.282                          | 0.014                        |
| 0.50       | 9.123                           | 0.017                        | 8.663                           | 0.005                        | 8.788                           | 0.005                        | 8.901                           | 0.005                        | 8.938                           | 0.005                        | 8.898                           | 0.005                        |
| 0.75       | 6.973                           | 0.005                        | 6.933                           | 0.005                        | 7.026                           | 0.005                        | 7.111                           | 0.004                        | 7.127                           | 0.006                        | 7.104                           | 0.005                        |
| 1          | 6.230                           | 0.004                        | 6.260                           | 0.005                        | 6.352                           | 0.005                        | 6.414                           | 0.004                        | 6.432                           | 0.004                        | 6.407                           | 0.004                        |
| 2          | 4.372                           | 0.005                        | 4.396                           | 0.005                        | 4.465                           | 0.004                        | 4.513                           | 0.005                        | 4.521                           | 0.005                        | 4.503                           | 0.004                        |
| 3          | 3.801                           | 0.004                        | 3.836                           | 0.005                        | 3.895                           | 0.004                        | 3.944                           | 0.006                        | 3.940                           | 0.004                        | 3.926                           | 0.005                        |
| 4          | 3.501                           | 0.005                        | 3.538                           | 0.005                        | 3.593                           | 0.005                        | 3.639                           | 0.005                        | 3.637                           | 0.005                        | 3.622                           | 0.005                        |
| 5          | 3.257                           | 0.005                        | 3.295                           | 0.005                        | 3.347                           | 0.005                        | 3.395                           | 0.005                        | 3.385                           | 0.006                        | 3.376                           | 0.006                        |
| 6          | 3.096                           | 0.006                        | 3.144                           | 0.004                        | 3.193                           | 0.006                        | 3.238                           | 0.005                        | 3.228                           | 0.006                        | 3.226                           | 0.005                        |
| 7          | 2.980                           | 0.007                        | 3.021                           | 0.006                        | 3.077                           | 0.005                        | 3.115                           | 0.005                        | 3.102                           | 0.006                        | 3.093                           | 0.006                        |
| 8          | 2.943                           | 0.005                        | 2.982                           | 0.005                        | 3.038                           | 0.005                        | 3.078                           | 0.005                        | 3.061                           | 0.006                        | 3.061                           | 0.007                        |
| 9          | 2.836                           | 0.005                        | 2.877                           | 0.006                        | 2.931                           | 0.005                        | 2.969                           | 0.005                        | 2.948                           | 0.005                        | 2.965                           | 0.007                        |
| 10         | 2.730                           | 0.005                        | 2.774                           | 0.006                        | 2.824                           | 0.005                        | 2.865                           | 0.006                        | 2.838                           | 0.007                        | 2.866                           | 0.006                        |
| 15         | 2.534                           | 0.006                        | 2.582                           | 0.007                        | 2.630                           | 0.006                        | 2.667                           | 0.007                        | 2.637                           | 0.006                        | 2.703                           | 0.007                        |
| 20         | 2.396                           | 0.008                        | 2.444                           | 0.006                        | 2.492                           | 0.006                        | 2.526                           | 0.008                        | 2.495                           | 0.007                        | 2.587                           | 0.006                        |
| 30         | 2.238                           | 0.007                        | 2.290                           | 0.007                        | 2.338                           | 0.007                        | 2.371                           | 0.006                        | 2.334                           | 0.007                        | 2.479                           | 0.007                        |
| 50         | 2.085                           | 0.006                        | 2.144                           | 0.009                        | 2.195                           | 0.007                        | 2.227                           | 0.008                        | 2.291                           | 0.009                        | 2.417                           | 0.007                        |
| 100        | 1.967                           | 0.009                        | 2.015                           | 0.007                        | 2.063                           | 0.007                        | 2.094                           | 0.008                        | 2.066                           | 0.008                        | 2.166                           | 0.010                        |

<sup>a</sup> Average value (mean) of 100 luminescence lifetime measurements (in microseconds) calculated as:  $\bar{\tau} = \frac{1}{n} \sum_{i=1}^n \tau_i$ ; <sup>b</sup> Standard deviation value (s) of 100 luminescence lifetime measurements (in microseconds) calculated as:  $s = \left( \frac{1}{n-1} \sum_{i=1}^n (\tau_i - \bar{\tau})^2 \right)^{1/2}$ .

**Table ESI-24.** Phase-shift measurements for different oxygen concentrations and several relative humidity of N969 immobilized into AP200/19 at 21°C. Modulation frequency of 94100 Hz.

| $pO_2$ (%) | 0% Hum.                  |                       | 10% Hum.                 |                       | 20% Hum.                 |                       | 40% Hum.                 |                       | 60% Hum.                 |                       | 80% Hum.                 |                       |
|------------|--------------------------|-----------------------|--------------------------|-----------------------|--------------------------|-----------------------|--------------------------|-----------------------|--------------------------|-----------------------|--------------------------|-----------------------|
|            | mean<br>(°) <sup>a</sup> | s<br>(°) <sup>b</sup> |
| 0.00       | 65.637                   | 0.109                 | 62.640                   | 0.006                 | 60.580                   | 0.011                 | 58.989                   | 0.012                 | 57.639                   | 0.013                 | 56.549                   | 0.014                 |
| 0.25       | 52.986                   | 0.008                 | 50.165                   | 0.012                 | 48.403                   | 0.009                 | 47.057                   | 0.008                 | 45.958                   | 0.008                 | 45.022                   | 0.008                 |
| 0.50       | 48.848                   | 0.007                 | 46.335                   | 0.009                 | 44.818                   | 0.007                 | 43.639                   | 0.008                 | 42.684                   | 0.010                 | 41.861                   | 0.012                 |
| 0.75       | 46.372                   | 0.011                 | 44.125                   | 0.008                 | 42.780                   | 0.008                 | 41.739                   | 0.009                 | 40.895                   | 0.008                 | 40.160                   | 0.010                 |
| 1          | 44.605                   | 0.012                 | 42.576                   | 0.010                 | 41.380                   | 0.011                 | 40.444                   | 0.009                 | 39.679                   | 0.008                 | 39.006                   | 0.010                 |
| 2          | 40.430                   | 0.010                 | 38.952                   | 0.010                 | 38.098                   | 0.011                 | 37.416                   | 0.010                 | 36.856                   | 0.010                 | 36.348                   | 0.010                 |
| 3          | 38.217                   | 0.013                 | 37.085                   | 0.009                 | 36.444                   | 0.009                 | 35.926                   | 0.009                 | 35.473                   | 0.008                 | 35.064                   | 0.008                 |
| 4          | 36.654                   | 0.015                 | 35.769                   | 0.009                 | 35.251                   | 0.010                 | 34.843                   | 0.010                 | 34.471                   | 0.011                 | 34.131                   | 0.008                 |
| 5          | 35.626                   | 0.011                 | 34.923                   | 0.009                 | 34.528                   | 0.009                 | 34.180                   | 0.010                 | 33.858                   | 0.011                 | 33.564                   | 0.011                 |
| 6          | 34.842                   | 0.009                 | 34.284                   | 0.011                 | 33.961                   | 0.010                 | 33.679                   | 0.011                 | 33.391                   | 0.010                 | 33.138                   | 0.011                 |
| 7          | 34.142                   | 0.010                 | 33.701                   | 0.009                 | 33.447                   | 0.009                 | 33.196                   | 0.010                 | 32.951                   | 0.010                 | 32.668                   | 0.010                 |
| 8          | 33.517                   | 0.013                 | 33.170                   | 0.011                 | 32.950                   | 0.008                 | 32.743                   | 0.011                 | 32.524                   | 0.010                 | 32.304                   | 0.011                 |
| 9          | 32.955                   | 0.008                 | 32.675                   | 0.009                 | 32.509                   | 0.012                 | 32.324                   | 0.010                 | 32.122                   | 0.011                 | 31.957                   | 0.010                 |
| 10         | 32.669                   | 0.009                 | 32.458                   | 0.010                 | 32.320                   | 0.010                 | 32.154                   | 0.010                 | 31.967                   | 0.010                 | 31.845                   | 0.010                 |
| 15         | 30.802                   | 0.017                 | 30.789                   | 0.010                 | 30.744                   | 0.011                 | 30.671                   | 0.009                 | 30.538                   | 0.015                 | 30.625                   | 0.014                 |
| 20         | 29.561                   | 0.009                 | 29.647                   | 0.012                 | 29.685                   | 0.011                 | 29.646                   | 0.009                 | 29.556                   | 0.013                 | 29.811                   | 0.009                 |
| 30         | 27.928                   | 0.013                 | 28.123                   | 0.011                 | 28.212                   | 0.010                 | 28.232                   | 0.012                 | 28.139                   | 0.014                 | 28.743                   | 0.011                 |
| 50         | 26.926                   | 0.013                 | 27.208                   | 0.013                 | 27.335                   | 0.010                 | 27.396                   | 0.013                 | 27.926                   | 0.012                 | 28.469                   | 0.013                 |
| 100        | 26.818                   | 0.013                 | 27.090                   | 0.016                 | 27.233                   | 0.012                 | 27.262                   | 0.015                 | 27.281                   | 0.014                 | 27.695                   | 0.013                 |

<sup>a</sup> Average value (mean) of 100 phase-shift measurements (in degrees) calculated as:  $\bar{\phi} = \frac{1}{n} \sum_{i=1}^n \phi_i$ ; <sup>b</sup> Standard deviation value (s) of 100 phase-shift measurements (in degrees) calculated as:  $s = \left( \frac{1}{n-1} \sum_{i=1}^n (\phi_i - \bar{\phi})^2 \right)^{1/2}$ .

**Table ESI-25.** Luminescence lifetime measurements for different oxygen concentrations and several relative humidity of N969 immobilized into AP200/19 at 21°C. Modulation frequency of 94100 Hz.

| $pO_2$ (%) | 0% Hum.                         |                              | 10% Hum.                        |                              | 20% Hum.                        |                              | 40% Hum.                        |                              | 60% Hum.                        |                              | 80% Hum.                        |                              |
|------------|---------------------------------|------------------------------|---------------------------------|------------------------------|---------------------------------|------------------------------|---------------------------------|------------------------------|---------------------------------|------------------------------|---------------------------------|------------------------------|
|            | mean<br>( $\mu$ s) <sup>a</sup> | s<br>( $\mu$ s) <sup>b</sup> | mean<br>( $\mu$ s) <sup>a</sup> | s<br>( $\mu$ s) <sup>b</sup> | mean<br>( $\mu$ s) <sup>a</sup> | s<br>( $\mu$ s) <sup>b</sup> | mean<br>( $\mu$ s) <sup>a</sup> | s<br>( $\mu$ s) <sup>b</sup> | mean<br>( $\mu$ s) <sup>a</sup> | s<br>( $\mu$ s) <sup>b</sup> | mean<br>( $\mu$ s) <sup>a</sup> | s<br>( $\mu$ s) <sup>b</sup> |
| 0.00       | 3.734                           | 0.003                        | 3.268                           | 0.002                        | 2.999                           | 0.003                        | 2.813                           | 0.003                        | 2.669                           | 0.004                        | 2.560                           | 0.003                        |
| 0.25       | 2.243                           | 0.001                        | 2.027                           | 0.001                        | 1.905                           | 0.001                        | 1.817                           | 0.001                        | 1.748                           | 0.001                        | 1.692                           | 0.001                        |
| 0.50       | 1.935                           | 0.001                        | 1.772                           | 0.001                        | 1.680                           | 0.001                        | 1.612                           | 0.001                        | 1.559                           | 0.001                        | 1.515                           | 0.001                        |
| 0.75       | 1.774                           | 0.001                        | 1.640                           | 0.001                        | 1.565                           | 0.001                        | 1.509                           | 0.001                        | 1.464                           | 0.001                        | 1.427                           | 0.001                        |
| 1          | 1.668                           | 0.001                        | 1.554                           | 0.001                        | 1.490                           | 0.001                        | 1.441                           | 0.001                        | 1.403                           | 0.001                        | 1.369                           | 0.001                        |
| 2          | 1.441                           | 0.001                        | 1.367                           | 0.001                        | 1.326                           | 0.001                        | 1.293                           | 0.001                        | 1.267                           | 0.001                        | 1.244                           | 0.001                        |
| 3          | 1.331                           | 0.001                        | 1.278                           | 0.001                        | 1.249                           | 0.001                        | 1.225                           | 0.001                        | 1.205                           | 0.001                        | 1.187                           | 0.001                        |
| 4          | 1.258                           | 0.001                        | 1.218                           | 0.001                        | 1.195                           | 0.001                        | 1.177                           | 0.001                        | 1.161                           | 0.001                        | 1.146                           | 0.001                        |
| 5          | 1.212                           | 0.001                        | 1.180                           | 0.001                        | 1.163                           | 0.001                        | 1.148                           | 0.001                        | 1.134                           | 0.001                        | 1.122                           | 0.001                        |
| 6          | 1.177                           | 0.001                        | 1.153                           | 0.001                        | 1.139                           | 0.001                        | 1.127                           | 0.001                        | 1.114                           | 0.001                        | 1.104                           | 0.001                        |
| 7          | 1.146                           | 0.001                        | 1.128                           | 0.001                        | 1.117                           | 0.001                        | 1.106                           | 0.001                        | 1.096                           | 0.001                        | 1.084                           | 0.001                        |
| 8          | 1.120                           | 0.001                        | 1.105                           | 0.001                        | 1.096                           | 0.001                        | 1.087                           | 0.001                        | 1.078                           | 0.001                        | 1.069                           | 0.001                        |
| 9          | 1.096                           | 0.001                        | 1.084                           | 0.001                        | 1.077                           | 0.001                        | 1.070                           | 0.001                        | 1.061                           | 0.001                        | 1.055                           | 0.001                        |
| 10         | 1.084                           | 0.001                        | 1.075                           | 0.001                        | 1.070                           | 0.001                        | 1.063                           | 0.001                        | 1.055                           | 0.001                        | 1.050                           | 0.001                        |
| 15         | 1.008                           | 0.001                        | 1.007                           | 0.001                        | 1.006                           | 0.001                        | 1.003                           | 0.001                        | 0.997                           | 0.001                        | 1.001                           | 0.001                        |
| 20         | 0.959                           | 0.001                        | 0.962                           | 0.001                        | 0.964                           | 0.001                        | 0.962                           | 0.001                        | 0.959                           | 0.001                        | 0.969                           | 0.001                        |
| 30         | 0.896                           | 0.001                        | 0.904                           | 0.001                        | 0.907                           | 0.001                        | 0.908                           | 0.001                        | 0.904                           | 0.001                        | 0.927                           | 0.001                        |
| 50         | 0.859                           | 0.001                        | 0.869                           | 0.001                        | 0.874                           | 0.001                        | 0.876                           | 0.001                        | 0.896                           | 0.001                        | 0.917                           | 0.001                        |
| 100        | 0.855                           | 0.001                        | 0.865                           | 0.001                        | 0.870                           | 0.001                        | 0.871                           | 0.001                        | 0.872                           | 0.001                        | 0.887                           | 0.001                        |

<sup>a</sup> Average value (mean) of 100 luminescence lifetime measurements (in microseconds) calculated as:  $\bar{\tau} = \frac{1}{n} \sum_{i=1}^n \tau_i$ ; <sup>b</sup> Standard deviation value (s) of 100 luminescence lifetime measurements (in microseconds) calculated as:  $s = \left( \frac{1}{n-1} \sum_{i=1}^n (\tau_i - \bar{\tau})^2 \right)^{1/2}$ .
